## An experimental workflow identifies nitrogenase proteins ready for expression in plant mitochondria

1 **Okada S.<sup>1#\*</sup>, Gregg C. M.<sup>2#</sup>, Allen R. S.<sup>2#</sup>, Menon A.<sup>2</sup>, Hussain, D.<sup>2</sup>, Gillespie, V.<sup>2</sup>,**  
2 **Johnston, E.<sup>2</sup>, Byrne, K.<sup>3</sup>, Colgrave, M.<sup>3</sup>, Wood, C. C.<sup>2\*</sup>**

3 <sup>1</sup> CSIRO Land and Water, GPO Box 1700, Acton, ACT 2601, Australia

4 <sup>2</sup>CSIRO Agriculture and Food, GPO Box 1700, Acton, ACT 2601, Australia

5 <sup>3</sup>CSIRO Agriculture and Food, 306 Carmody Rd, St Lucia, QLD 4067, Australia

6 # Co-first authorship

7 \* Correspondence: craig.wood@csiro.au

8

9 **Keywords: Nitrogenase, Nif, mitochondria, MTP, MPP, solubility, Klebsiella, (Min.5-**  
10 **Max. 8)**

### 11 **Abstract**

12 Industrial nitrogen fertilizer is intrinsic to modern agriculture yet expensive and  
13 environmentally harmful. We aim to reconstitute bacterial nitrogenase function within plant  
14 mitochondria to reduce nitrogen fertilizer usage. Many nitrogen fixation (Nif) proteins are  
15 required for biosynthesis and function of the mature nitrogenase enzyme, and these will need  
16 to be correctly processed and soluble within mitochondria as a pre-requisite for function.  
17 Here we present our workflow that assessed processing, solubility and relative abundance of  
18 16 *Klebsiella oxytoca* Nif proteins targeted to the plant mitochondrial matrix using an  
19 Arabidopsis mitochondrial targeting peptide (MTP). The functional consequence of the N-  
20 terminal modifications required for mitochondrial targeting of Nif proteins was tested using  
21 bacterial nitrogenase assays. We found that despite the use of the same constitutive promoter  
22 and MTP, MTP::Nif processing and relative abundance in plant leaf varied considerably.  
23 Assessment of solubility for all MTP::Nif proteins found NifF, M, N, S, U, W, X, Y and Z  
24 were soluble, while NifB, E, H, J, K, Q and V were mostly insoluble. Although most Nif  
25 proteins tolerated the N-terminal extension as a consequence of mitochondrial processing,

26 this extension in NifM reduced nitrogenase activity to 10% of controls. Using proteomics, we  
27 detected a ~50-fold increase in the abundance of NifM when it contained the N-terminal  
28 MTP extension, which may account for this reduction seen in nitrogenase activity. Based on  
29 plant mitochondrial processing and solubility, and retention of function in a bacterial assay,  
30 our workflow has identified that NifF, N, S, U, W, Y and Z satisfied all these criteria. Future  
31 work can now focus on improving these parameters for the remaining Nif components to  
32 assemble a complete set of plant-ready Nif proteins for reconstituting nitrogen fixation in  
33 plant mitochondria.

34

## 35 **1 Introduction**

36 Industrial nitrogen fixation has had a major contribution towards the Green Revolution, and  
37 subsequent unprecedented population growth (Smil, 1999). However, the increase in global  
38 use of synthetic nitrogen fertilizer has resulted in environmental pollution, contributing to  
39 algal blooms, greenhouse gas accumulation and the acidification of soil and water sources  
40 (Glibert et al., 2014; Vitousek et al., 1997). There have been several efforts in the past 50  
41 years to look for alternative, more sustainable means to deliver reduced nitrogen to crops,  
42 including the use of artificial symbiosis and commensal free-living bacteria (Santi et al.,  
43 2014; Oldroyd and Dixon, 2014, Curatti and Rubio, 2014). More recently, advances in  
44 synthetic biology have reignited the possibility of generating transgenic crops that can fix  
45 their own nitrogen via direct engineering of nitrogenase (Nif) proteins into plants.

46 Nitrogenase is the enzyme that catalyses biological nitrogen fixation, i.e. the conversion of  
47 atmospheric nitrogen to ammonia, and is found exclusively in bacteria and archaea. The  
48 molybdenum-dependent nitrogenase consists of two proteins, which are highly oxygen-  
49 sensitive: The MoFe protein, a heterotetramer of NifD and NifK, and the Fe protein, a  
50 homodimer of NifH. NifDK is the catalytic centre and contains the iron-molybdenum  
51 cofactor ( $[\text{MoFe}_7\text{S}_9\text{C}]:\text{homocitrate}$ , FeMo-co; Einsle et al., 2002; Spatzal et al., 2011) and the  
52 P-cluster ( $[\text{Fe}_8\text{S}_7]$ ; Kim and Rees, 1992). NifH is the obligate electron donor, and contains a  
53  $[\text{Fe}_4\text{S}_4]$ -cluster (Jang et al., 2000). In addition to the structural proteins, several other Nif  
54 proteins are involved in the maturation of the enzyme and assembly of the metalloclusters.  
55 These include, but may not be limited to NifB, E, M, N, Q, S, U, V, W, X, Y, and Z (Ribbe et  
56 al., 2014). Furthermore, nitrogenase also utilizes specific electron transport proteins, NifF and

57 NifJ (Deistung et al., 1985; Shah et al., 1983). For optimum nitrogenase activity, the  
58 stoichiometry of the numerous Nif proteins and their temporal expression needs to be tightly  
59 regulated (Pozza-Carrion et al., 2015).

60 The mitochondrial matrix has been shown to be a suitable location to express some of the  
61 most oxygen-sensitive Nif proteins in a functional form (Lopez-Torrejon et al., 2016; Buren  
62 et al., 2017a, Buren et al., 2019). However, it is currently technically difficult to directly  
63 introduce transgenes into the mitochondrial genome and recover stable transgenic plants  
64 (Macmillan et al., 2019). In this study we rely upon the endogenous mitochondrial protein  
65 transport pathway for the expression of nuclear-encoded genes within the mitochondrial  
66 matrix (Fig. 1; reviewed by Murcha et al., 2014). This process involves the use of  
67 mitochondrial targeting peptides (MTPs) as translational fusions at the N-terminus of each  
68 Nif protein (MTP::Nif). After translation in the cytoplasm the MTP::Nif protein is actively  
69 transported to the mitochondrial matrix through the outer and inner transmembrane import  
70 complexes. The MTP is cleaved within the mitochondrial matrix by the mitochondrial  
71 processing peptidase (MPP) and the remaining C-terminus is folded into the mature protein.  
72 The MPP-dependent processing of the MTP results in residual amino acids at the N-terminus  
73 of the transgenic Nif proteins, and here we term this the ‘scar’ peptide.

74 These N-terminal modifications could potentially impact the function of Nif proteins, and it is  
75 currently unknown if all Nif proteins can tolerate a scar peptide. The clearest example of scar  
76 peptides being tolerated was shown by the isolation of functional NifH from yeast  
77 mitochondria, a result dependent on the import, MPP processing and refolding of MTP::NifH  
78 and MTP::NifM (Lopez-Torrejon et al., 2016). As an alternative approach to using  
79 eukaryotic platforms that currently present numerous challenges, bacterial-based assays can  
80 be used to guide modifications to Nif proteins (Yang et al., 2018).

81 Another important consideration for function is the solubility of each Nif protein in plant  
82 mitochondria. Burén et al. (2017a) found that NifB from *Azotobacter vinelandii* was  
83 insoluble when it was targeted to the mitochondrial matrix of both yeast and plants.  
84 Encouragingly these authors found two variants of NifB from a thermophilic archaea that was  
85 soluble within the yeast mitochondrial matrix and active in a reconstitution assay (Buren et  
86 al., 2017a, 2019). Aside from NifB, the solubility of other Nif proteins has not been directly  
87 assessed within plant mitochondria.

88 Previously we targeted 16 *Klebsiella oxytoca* Nif proteins to plant mitochondria using an  
89 MTP of 77 amino acids. In this study, we design and test a shorter MTP fused to the 16 Nif  
90 proteins and assess abundance, processing and solubility of the synthetic proteins when  
91 targeted to the plant mitochondria. This shortened MTP is cleaved within the matrix to leave  
92 a nine amino acid scar, and we use a bacterial assay to assess the functional impact of this N-  
93 terminal modification to each Nif protein. Our analysis has identified a subset of MTP::Nif  
94 proteins that satisfy the requirements of being soluble, correctly processed, and functional.  
95 These MTP::Nif proteins are now ready for further downstream analysis and functional  
96 testing in plant mitochondria.

97

## 98 **2 Results**

### 99 **2.1 Design and testing a 51 amino acid MTP for MPP processing of MTP::Nif** 100 **proteins in plant mitochondria**

101 Our previous work targeting Nif proteins to the mitochondrial matrix utilised a 77 amino acid  
102 (AA) peptide of the N-terminus of the ATP synthase  $\gamma$  subunit from *Arabidopsis thaliana*  
103 (pFA $\gamma$ 77, Allen et al., 2017). Processing of pFA $\gamma$ 77 by the MPP resulted in a 35 AA residual  
104 ‘scar’ on the N-terminus of the Nif protein. However, introducing long N-terminal extensions  
105 to Nif proteins may impair function via steric hindrance. We therefore wanted to shorten the  
106 MTP sequence to minimise the remaining scar yet retain targeting capability to the plant  
107 mitochondrial matrix. Previously Lee et al. (2012) showed that residues 52 to 77 of the  
108 original pFA $\gamma$ 77 were possibly not required for transporting and processing of green  
109 fluorescent protein to the mitochondrial matrix. Based on these observations we redesigned a  
110 shorter MTP with a length of 51 AA, here termed pFA $\gamma$ 51. pFA $\gamma$ 51 is predicted to leave a  
111 nine AA N-terminal extension after MPP processing that we term scar9 (amino acid sequence  
112 ISTQVVRNR; Fig. 2A; Huang et al., 2009). To confirm the site of cleavage of pFA $\gamma$ 51 fused  
113 to Nif proteins we constructed a translational fusion of pFA $\gamma$ 51::NifU::Twin-Strep-tag®  
114 (SN166; Twin-Strep-tag®, Schmidt et al., 2013) using a modular Golden Gate assembly  
115 method (Weber et al., 2011). After infiltration of SN166 into *N. benthamiana* leaf this protein  
116 was purified by affinity chromatography (Suppl. Fig. 1) and subjected to proteomics analysis,  
117 which identified ISTQVVR as the N-terminal peptide sequence. This result confirmed that

118 the shortened MTP, pFA $\gamma$ 51, was functional and processed as predicted to leave a nine AA  
119 scar at the N-terminus.

## 120 **2.2 Most pFA $\gamma$ 51::Nif proteins are targeted to and processed in the plant**

### 121 **mitochondrial matrix**

122 We next wanted to assess whether the shortened MTP, pFA $\gamma$ 51, was able to target other Nif  
123 proteins to the plant mitochondrial matrix. We generated expression constructs for 16 Nif  
124 proteins with translational fusions of pFA $\gamma$ 51 at the N-terminus and a HA epitope tag at the  
125 C-terminus, resulting in the generic structure pFA $\gamma$ 51::Nif::HA (Fig. 2A, plant expression  
126 constructs listed in Suppl. Table 2). NifK was the only protein for which a different construct  
127 was made, where the HA-tag was included at the N-terminus, since any C-terminal fusions  
128 render NifK non-functional (Yang et al., 2018). Expression of pFA $\gamma$ 51::NifD::HA will be  
129 reported as part of a separate study (Allen et al., 2019 <https://doi.org/10.1101/755116>) and  
130 therefore was not included in this study. We constructed control expression plasmids to  
131 mimic the processed protein size for all Nif proteins by replacing pFA $\gamma$ 51 with 6 $\times$ His. These  
132 6 $\times$ His::Nif::HA proteins are expected to be located to the cytoplasm. Both pFA $\gamma$ 51::Nif::HA  
133 and 6 $\times$ His::Nif::HA were infiltrated, separately, in transient *N. benthamiana* leaf assays and  
134 the migration speeds of the expressed proteins assessed by Western blot analysis.

135 Comparison of each Nif protein targeted to either the mitochondrial matrix or cytoplasm  
136 demonstrated that 15 of 16 Nif proteins targeted to the mitochondria using pFA $\gamma$ 51 were  
137 processed by MPP, although with variable efficiency (Fig. 2B, full blot images provided in  
138 Suppl. Fig. 1). We observed three general classes of processing efficiency – the first being  
139 efficiently cleaved, second being partially cleaved, and the last being poorly cleaved to not  
140 cleaved at all. Efficient cleavage was found for eight pFA $\gamma$ 51::Nif::HA (NifB, E, H, J, N, U,  
141 V, W) and pFA $\gamma$ 51::HA::NifK proteins. Six pFA $\gamma$ 51::Nif::HA proteins (NifF, M, S, X, Y, Z)  
142 were partially cleaved, as evidenced by the presence of two HA-dependent signals, the faster  
143 band migrating at the speed of the corresponding 6 $\times$ His::Nif::HA control and another slower  
144 band running at a speed consistent with the size of the unprocessed pFA $\gamma$ 51::Nif::HA  
145 (predicted unprocessed protein sizes provided in Suppl. Table 1). The only protein displaying  
146 no processing was pFA $\gamma$ 51::NifQ::HA, with only a signal found for a protein consistent with  
147 the unprocessed size (Fig. 2B). For some pFA $\gamma$ 51::Nif::HA proteins, e.g. NifB, E, H, S, U  
148 and Z there were additional signals at a higher molecular weight, which could arise from  
149 dimerization or oligomerization (Suppl. Fig. 2, 3 and 4), similar to what has been previously

150 observed (Allen et al., 2017). In some instances, e.g. NifJ, we also observed degradation  
151 products (Suppl. Fig. 2).

152 Using Western blot analysis to assess MPP processing further provided an indication of the  
153 relative abundance of each Nif protein in the transient leaf assay system. In general, we found  
154 that most of the pFA $\gamma$ 51::Nif::HA and pFA $\gamma$ 51::HA::NifK proteins were readily detectable,  
155 although their abundance varied (Fig. 2B). For instance pFA $\gamma$ 51::NifY::HA had a relatively  
156 low signal intensity whereas NifH, F and U had the highest signal intensities. Another  
157 observation worth noting was the difference in abundance between cytoplasmic- and  
158 mitochondria-targeted Nif proteins. NifB, E, H, U, V and W proteins targeted to the  
159 mitochondria accumulated to higher levels than when targeted to the cytoplasm, whereas the  
160 level of expression of the other Nif proteins were approximately equal between the  
161 mitochondrial and cytoplasmic forms.

### 162 **2.3 Solubility testing of Nif proteins targeted to leaf mitochondria**

163 As all Nif proteins need to be soluble for function we tested solubility of the Nif proteins  
164 when targeted to the plant mitochondrial matrix. Total protein extracts of *N. benthamiana*  
165 leaf tissue individually expressing 16 pFA $\gamma$ 51::Nif::HA and pFA $\gamma$ 51::HA::NifK were  
166 separated into soluble and insoluble fractions and analyzed by Western blot (Fig. 3, full blot  
167 image provided in Suppl. Fig. 3). We found that the relative abundance of correctly  
168 processed Nif proteins in the soluble fraction varied for each  
169 pFA $\gamma$ 51::Nif::HA/pFA $\gamma$ 51::HA::NifK. For example NifF, M, N, Q, S, and W were  
170 predominantly in the soluble fraction in both the correctly processed and unprocessed form.  
171 Conversely NifB, E, H, J, and V were not found in the soluble fraction, despite being  
172 correctly processed. As NifM may be required for stability and solubility of NifH in bacteria  
173 (Lei et al., 1999; Howard et al., 1986) we tested coexpression of mitochondrially targeted  
174 pFA $\gamma$ 51::NifH::HA and pFA $\gamma$ 51::NifM::HA in transient leaf assays but found no  
175 improvement in the solubility of NifH (data not shown). We found a third band for NifF  
176 between the processed and unprocessed form, which was possibly an artefact of protein  
177 extraction, as it was not detected in Western blot of total protein. Interestingly,  
178 pFA $\gamma$ 51::NifQ::HA produced a faint band approximately the size of the correctly processed  
179 form in the soluble fraction, which was not detectable in the total protein Western blot. To  
180 assess if atmospheric oxygen affected Nif protein solubility the same 16  
181 pFA $\gamma$ 51::Nif::HA/pFA $\gamma$ 51::HA::NifK proteins were isolated from infiltrated plants under



182 anaerobic conditions and subjected to Western blot analysis. We found that anaerobic  
183 conditions during protein extraction did not change their solubility (Suppl. Fig. 4).

#### 184 **2.4 Testing function of modified Nif proteins with an N-terminal extension**

185 Using a bacterial assay we tested the functional impact of adding nine AA to the N-terminus  
186 of each Nif protein, which mimics the residual scar peptide that remains after MPP  
187 processing of pFA $\gamma$ 51::Nif in plant mitochondria. We adopted the MIT v2.1 plasmid system  
188 (Smanski et al., 2014) for this assay, and fused the nine AA scar9 sequence, MSTQVVRNR,  
189 to the N-terminus of each Nif protein, mimicking the length and sequence of pFA $\gamma$ 51 after  
190 MPP cleavage. An example of the process is outlined with scar9::NifH replacing NifH within  
191 MIT v2.1 (Fig. 4). Each scar9::Nif was tested individually in separate MIT v2.1 plasmids in  
192 the same manner (bacterial expression constructs listed in Suppl. Table 3). It is worth noting  
193 that MIT v2.1 does not have NifX and therefore we did not test the impact of scar9 on this  
194 protein with respect to nitrogenase function. As a negative control we removed NifH, D, K,  
195 Y, E, N, and J from MIT v2.1 and made a non-functional plasmid, here termed 'pB-ori'. As  
196 further controls we made other modifications, such as adding a HA epitope tag to the C-  
197 terminus of NifK, namely NifK::HA, or removing NifM from MIT v2.1 (cf. Lei et al., 1999;  
198 Howard et al., 1986), both of which resulted in the expected loss of nitrogenase function  
199 (Table 1). Function testing of the individual scar9::Nif proteins in *E. coli* by acetylene  
200 reduction showed that activity was retained for all 16 scar9::Nif proteins although there was  
201 variation in activity levels. Notably scar9::NifJ had three times the activity of the positive  
202 control, and scar9::NifQ, H, B and F were mildly increased (130-150% activity relative to  
203 MIT v2.1). In contrast, scar9::NifM only retained approximately 10% activity of the positive  
204 control.

205 To assess if the scar9 peptide had any influence on the relative abundance of each Nif protein  
206 in *E. coli*, we measured the relative protein abundance of the Nif proteins D, K, H, S and M,  
207 in *E. coli* containing the native and modified forms of MIT v2.1 using targeted proteomics.  
208 We also measured the relative abundance of a peptide specific to chloramphenicol  
209 acyltransferase (CAT), the coding nucleotide sequence of which was present in all MIT v2.1  
210 plasmids. We found that signals for NifS and CAT peptides were relatively consistent across  
211 all the samples (Suppl. Fig. 5, Suppl. Table 1). As expected, we also found that signals  
212 specific to NifM, peptides M-1 and -2, were not found in *E. coli* containing MIT v2.1 in  
213 which NifM was deleted, and that signals specific for NifD, K, H, Y, E, and N were not

214 found in *E. coli* with pB-ori, where these genes were removed from MIT v2.1 (data not  
215 shown). The most unexpected change was found for NifM, where the relative protein  
216 abundance was approximately ~50-fold higher in *E. coli* expressing scar9::NifM, relative to  
217 those expressing other scar9::Nifs (Suppl. Fig. 5).

218

### 219 **3 Discussion**

220 In this study we present a workflow to assess key functional prerequisites of MTP::Nif  
221 proteins targeted to plant mitochondria. These were cleavage of the MTP by the MPP in the  
222 mitochondrial matrix, solubility, relative protein abundance and tolerance of N-terminal scar  
223 sequences for function. The plant- and bacterial- based assays identified seven Nif proteins,  
224 namely NifF, N, S, U, W, Y and Z, that we consider ready for metabolic engineering of  
225 nitrogenase into plant mitochondria using pFA $\gamma$ 51 as the MTP. Importantly, we also found  
226 other MTP::Nif proteins to be either poorly processed and/or insoluble in plant mitochondria,  
227 or impaired in functional assays. The identification of these problematic MTP::Nif proteins  
228 can guide targeted improvements in the future.

229 We have found relative protein abundance, processing efficiency, and solubility of the 16  
230 different MTP::Nif proteins varied, despite use of the same MTP and promoter for each plant  
231 expression construct. This variation illustrates how intrinsic properties of each Nif protein  
232 influence these attributes in plant mitochondria. Assuming that levels of plant expressed Nif  
233 proteins will need to reflect those of diazotrophic bacteria, future studies will need to adjust  
234 promoter strength and/or translation rates accordingly. For example NifY was the least  
235 abundant in our experiments, and efforts are needed to improve these levels to better mimic  
236 those found in naturally occurring systems (Smanski et al., 2014).

237 Similarly we found some MTP::Nif proteins were poorly cleaved by the MPP, in particular  
238 MTP::NifQ. A potential reason for this may be that the preprotein is unable to enter the  
239 mitochondrial matrix due to the MTP::Nif protein being resistant to unfolding (Voos et al.,  
240 1993, 1996). We also found that most Nif proteins that were successfully cleaved within the  
241 mitochondrial matrix tended to accumulate to higher levels relative to their cytoplasmic  
242 counterparts, suggesting that mitochondrial processing may stabilize Nif proteins relative to  
243 those located in the cytoplasm.



244

245 In our experiments we found several MTP::Nif proteins were insoluble in the plant  
246 mitochondrial matrix. Notably the key protein NifH from *K. oxytoca* was among this set.  
247 Interestingly *A. vinelandii* NifH and NifM when targeted to yeast mitochondria produced a  
248 functional Fe protein (Lopez-Torrejon et al., 2016), indicating that both these proteins were  
249 sufficiently soluble in yeast. In agreement with prior results, we found that *K. oxytoca* NifB  
250 was insoluble when targeted to plant mitochondria, as was described for *A. vinelandii* NifB  
251 when targeted to yeast and plant mitochondria (Burén et al., 2017a).

252 Overcoming these processing, solubility and abundance issues we encountered will require a  
253 range of approaches. There is evidence in yeast mitochondria that the import of transgenic  
254 cargoes can be improved by the use of longer MTPs (Wilcox et al., 2005). Therefore  
255 screening alternate length MTPs may reveal certain MTP::Nif combinations that overcome  
256 problems with recalcitrant import. Other bacterial or archaeal variants of the nitrogen fixation  
257 pathway can also provide the means to improve targeting, processing and ultimately activity  
258 of nitrogenase within mitochondria, as was shown for nifB (Burén et al., 2017a, 2019).

259 Although this report concentrates on attributes of Nif proteins expressed individually, there  
260 may be combinations of Nif proteins that when expressed together improve abundance or  
261 solubility. Functional *Azotobacter* Nif proteins have been successfully expressed in  
262 combination within yeast mitochondria (Burén et al., 2017b, 2019; Lopez-Torrejon et al.,  
263 2016), and these combinations may overcome problems that we report here. Finally,  
264 physically linking Nif proteins into larger multi-domain polyproteins (Allen et al., 2019  
265 <https://doi.org/10.1101/755116>, Yang et al., 2018) that can assist in protein assembly may  
266 also overcome problems associated with solubility identified in this report.

267 The function of nitrogenase may be impacted by residual terminal scar residues remaining  
268 after mitochondrial targeting. Yang et al. (2018) demonstrated that the addition of the tobacco  
269 etch virus protease cleavage site to the C-terminus of NifK abolished activity, a result that  
270 could be predicted from the close interaction of NifK with NifD (Spatzal et al., 2011). Here  
271 we tested a 9 AA scar on the N-terminus of 16 Nif proteins and found both positive and  
272 negative impacts on overall nitrogenase activity. Importantly we found that the key protein  
273 NifH supported nitrogen fixation with the N-terminal addition. NifH has three different  
274 functions, firstly, donating electrons to NifDK, secondly, maturation of the [Fe<sub>8</sub>S<sub>7</sub>] P-clusters

275 within NifDK, and thirdly as a molybdenum and homocitrate insertase to NifEN (reviewed in  
276 Hu and Ribbe 2013). In a previous study, NifH isolated from yeast mitochondria was capable  
277 of donating electrons to NifDK (Lopez-Torrejón et al., 2016). Our study demonstrates that  
278 the additional functions of NifH can also occur despite the addition of the MTP scar  
279 sequence.

280 Examples of Nif proteins that did not tolerate the N-terminal extension with the MTP that  
281 was tested were NifE, N and M. In the case of NifEN these proteins form a stable  
282 heterotetramer, but also interact with numerous other Nif proteins during the biogenesis of  
283 FeMo-co, including NifB, NifY, NafY, NifX and NifH (Ribbe et al., 2014). The N-terminal  
284 extension on NifE and NifN that was tested in our study may have reduced nitrogenase  
285 function via steric hindrance within protein-protein interactions associated with NifEN. The  
286 most severe impact on nitrogenase function was found for scar9::NifM (~10% of control), but  
287 in that instance proteomics analysis found that the abundance of scar9::NifM was highly up-  
288 regulated compared with other modified MIT v2.1 plasmids. As nitrogenase activity is highly  
289 sensitive to changes in Nif protein levels (reviewed in Martínez-Argudo et al., 2004) this  
290 misregulation may account for the decrease in nitrogenase activity seen with scar9::NifM,  
291 rather than reflecting steric interference.

292 Although mitochondria are considered potentially suitable to support nitrogenase activity,  
293 impediments remain to successfully translocating all Nif proteins to the organelle. This is not  
294 surprising considering the large span of evolutionary time separating the emergence of  
295 nitrogenase in bacteria from the origins of mitochondria in eukaryotes (Muller et al., 2012;  
296 Poole and Gribaldo, 2014). Our testing uncovered some Nif proteins that we consider  
297 compatible with translocation to plant mitochondria and other Nif proteins that require further  
298 improvement. The experimental framework outlined here can be applied systematically to  
299 iteratively improve each Nif protein with the eventual goal of assembling the entire pathway  
300 within plant mitochondria.

301

## 302 **4 Materials and Methods**

### 303 **4.1 Construction of plasmids for *Nicotiana benthamiana* leaf transient expression**

304 Plasmids for transient expression in *N. benthamiana* leaf were constructed using a modular  
305 cloning system with Golden Gate assembly (Weber et al., 2011). DNA parts as individual  
306 plasmids (Thermo Fisher Scientific, ENSA), each containing the 35S CaMV promoter  
307 (EC51288), the gene coding for the first 51 amino acids of the Arabidopsis F1-ATPase  $\gamma$   
308 subunit (pFA $\gamma$ 51), plant codon optimised *nifH* (EC38011), *nifK* (EC38015), *nifY* (EC38019),  
309 *nifE* (EC38016), *nifN* (EC38024), *nifJ* (EC38022), *nifB* (EC38017), *nifQ* (EC38025), *nifF*  
310 (EC38021), *nifU* (EC38026), *nifS* (EC38018), *nifV* (EC38020), *nifW* (EC38027), *nifZ*  
311 (EC38029), *nifM* (EC38023), *nifX* (EC38028), plant codon optimised HA epitope tag  
312 (EC38003), and CaMV terminator (EC41414) were assembled into plant expression vectors  
313 (EC47772, EC47742, EC47751, EC47761, EC47781) using Type IIS restriction cloning. The  
314 plasmid ID and descriptions are listed in Supplementary Table 2.

#### 315 **4.2 Plant growth and transient transformation of *N. benthamiana***

316 *N. benthamiana* plants were grown in a Conviron growth chamber at 23°C under a 16:8 h  
317 light:dark cycle with 90  $\mu\text{mol}/\text{min}$  light intensity provided by cool white fluorescent lamps.  
318 *Agrobacterium tumefaciens* strain GV3101 (SN vectors) or AGLI (P19 vector) cells were  
319 grown to stationary phase at 28°C in LB broth supplemented with 50 mg/mL carbenicillin or  
320 50 mg/mL kanamycin, according to the selectable marker gene on the vector, and 50 mg/mL  
321 rifampicin. Acetosyringone was added to the culture to a final concentration of 100  $\mu\text{M}$  and  
322 the culture was then incubated for another 2.5 h at 28°C with shaking. The bacteria were  
323 pelleted by centrifugation at 5000 x *g* for 10 min at room temperature. The supernatant was  
324 discarded, and the pellet was resuspended in 10 mM MES pH 5.7, 10 mM  $\text{MgCl}_2$  and  
325 100  $\mu\text{M}$  acetosyringone (infiltration buffer) after which the  $\text{OD}_{600}$  was measured. A volume  
326 of each culture, including the culture containing the viral suppressor construct 35S::P19,  
327 required to reach a final concentration of  $\text{OD}_{600} = 0.10$  was added to a fresh tube. The final  
328 volume was made up with the infiltration buffer. Leaves of five-week-old plants were then  
329 infiltrated with the culture mixture and the plants were grown for five days after infiltration  
330 before leaf samples were harvested for further analysis/experiments.

#### 331 **4.3 Western blot analysis of Nif proteins transiently expressed in *N. benthamiana***

332 To assess the processing of mitochondrially targeted and cytoplasmically located proteins,  
333 leaf disks of 180  $\text{mm}^2$  were harvested from *N. benthamiana* and the proteins were extracted,  
334 subjected to SDS-PAGE and Western blot according to Allen et al. (2017). Monoclonal anti-

335 HA antibody produced in mouse (Sigma-Aldrich) was used as the primary antibody and  
336 Immun-Star Goat Anti-Mouse (GAM)-HRP conjugate (Bio-Rad) was used as the secondary  
337 antibody. The PageRuler™ Prestained Protein Ladder (Thermo Fisher Scientific) and the  
338 BenchMark™ Pre-Stained Protein Ladder (Thermo Fisher Scientific), which was re-  
339 calibrated against the unstained BenchMark™ protein ladder to 146 kDa, 91 kDa, 63 kDa,  
340 50 kDa, 40 kDa, 33 kDa, 22 kDa, 17 kDa, 14 kDa and 10 kDa, were used as molecular size  
341 markers.

342 For solubility testing the harvested leaf tissue was ground in liquid nitrogen using a mortar  
343 and pestle and transferred to a microfuge tube. Three hundred (300) µL of cold solubility  
344 buffer (50 mM Tris-HCl pH 8.0, 75 mM NaCl, 100 mM mannitol, 2 mM DTT, 0.5% (w/v)  
345 polyvinylpyrrolidone (average MW 40 kDa), 5% (v/v) glycerol, 0.2 mM PMSF, 10 µM  
346 leupeptin and 0.5% (v/v) Tween® 20) was added and the samples were centrifuged for 5 min  
347 at 16,000 x g at 4°C. The supernatant was transferred to a fresh tube and the pellet was  
348 resuspended in 300 µL of fresh cold solubility buffer. Both, the supernatant (sample 1) and  
349 the resuspended pellet (sample 2) were centrifuged again for 5 min at 16,000 x g at 4°C.  
350 From sample 1 a subsample was taken, which is referred to as the soluble fraction. This  
351 subsample was mixed with an equivalent amount of 4 x SDS buffer (250 mM Tris-HCl pH  
352 6.8, 8% (w/v) SDS, 40% (v/v) glycerol, 120 mM DTT and 0.004% (w/v) bromophenol blue).  
353 After the second centrifugation step, the supernatant of sample 2 was discarded. The pellet is  
354 referred to as the insoluble fraction. The pellet was resuspended in 300 µL 4 x SDS buffer  
355 and 300 µL of solubility buffer were added. When soluble and insoluble fractions were  
356 compared to the amount of total protein, the leaf piece for the total protein sample was  
357 ground as described above. However, the ground sample was resuspended in 300 µL 4 x SDS  
358 buffer and 300 µL of solubility buffer were added. Samples for the total, insoluble and  
359 soluble fractions were heated at 95°C for 3 min and then centrifuged at 12000 x g for 2 min.  
360 20 µL of the supernatant containing the extracted polypeptides was loaded on a NuPAGE Bis  
361 Tris 4-12% gels (Thermo Fisher Scientific) for gel electrophoresis and Western blot analysis.

362 For Western blot analysis of anaerobically extracted proteins, the extractions were carried out  
363 in an anaerobic chamber (COY Laboratory Products) filled with a H<sub>2</sub>/N<sub>2</sub> atmosphere (2-  
364 3%/97-98%). Anaerobic extraction solutions were prepared at a Schlenk line in a bottle  
365 equipped with a butyl rubber septum by at least four cycles of evacuating and purging with  
366 N<sub>2</sub>. Leaf disks were ground in cold solubility buffer instead of liquid nitrogen.

#### 367 **4.4 Isolation of pFAy51::NifU::twin-Strep from *N. benthamiana***

368 *N. benthamiana* leaves infiltrated with SN166 and P19 were harvested 4 days post  
369 infiltration. Three (3.0) g leaf tissue was ground in 30 mL of 100 mM Tris-HCl pH 8.0,  
370 150 mM NaCl, 5% (v/v) glycerol, 2 mM TCEP, 1% (w/v) PVP (average MW 40 kDa) and  
371 0.1% Tween 20 using a mortar and pestle. The extract was centrifuged at 40,000 x g for 30  
372 min at 10°C. The supernatant was loaded on a StrepTactinXT (IBA Lifesciences) column  
373 with a column volume of 2 mL equilibrated in 100 mM Tris-HCl pH 8.0, 150 mM NaCl,  
374 2 mM TCEP (wash buffer). After loading, the column was washed with 20 mL wash buffer  
375 and the protein was eluted with 5 mL 100 mM Tris-HCl pH 8.0, 150 mM NaCl, 2 mM TCEP  
376 and 50 mM biotin. The eluate was concentrated using an Amicon® Ultra centrifugal filter  
377 (10 kDa MWCO). Samples from the supernatant, flow through and eluate were subjected to  
378 SDS-PAGE on a 4-12% NuPage SDS gel. Proteins were transferred to PVDF membranes  
379 with the iBlot dry blotting system (Thermo Fisher Scientific), washed with TBST and  
380 developed using the Strep-Tactin-HRp conjugate (IBA Lifesciences). The SDS gel was  
381 stained after blotting with SimplyBlue™ SafeStain (Thermo Fisher Scientific).

#### 382 **4.5 Construction of modified MIT v2.1 plasmids for function testing in *Escherichia*** 383 ***coli***

384 First, MIT v2.1 was split into two parts for easier modification of the *nif* genes by PCR. The  
385 first half containing *nifHDKYENJ* was amplified with SbfI sites on either end (with oligos  
386 MIT\_v2.1\_SbfInifH\_FW2 5'-  
387 AACCTGCAGGTGACGTCTAAGAAAAGGAATATTCAGCAAT-3', and  
388 MIT\_v2.1\_SbfInifJ\_RV2 5'-AACCTGCAGGGCTAACTAACTAACCCACGGACAAAAAACC-  
389 3') and ligated into pCR Blunt II TOPO (Thermo Fisher Scientific). The second half  
390 containing *nifBQFUSVWZM* was amplified with SbfI sites on either end (with oligos  
391 MIT\_v2.1\_SbfInifB\_FW 5'- AACCTGCAGGTACTCTAACCCCATCGGCCGTCTTA-3', and  
392 MIT\_v2.1\_SbfInifR\_RV 5'-AACCTGCAGGTACGTAGCAATCAACTCACTGGCTC-3'),  
393 digested with SbfI, and ligated back together. This religated plasmid, herein termed pB-ori,  
394 was used as a negative control for nitrogenase function testing. The positive control was  
395 constructed by ligating SbfI digested pCR Blunt II TOPO containing *nifHDKYENJ* and pB-  
396 ori. The scar9 extension (ATGTCAACTCAAGTGGTGGCGTAACCGC coding for  
397 MSTQVVRNR) was added to the front of fw primers that bind to the start of the coding  
398 sequence for each *nif* gene, and rv primers were designed adjacent to the 5' end of each *nif*

399 gene that the scar9 was being added (primers listed in Suppl. Table 4). The amplified PCR  
400 product containing the scar9 extension in front of a given *nif* gene was ligated using ligation  
401 cycling reaction (LCR; de Kok et al., 2014). The other half of MIT v2.1 that was not  
402 modified was religated with the half with the scar9 extension via SbfI restriction sites. The  
403 plasmid ID and descriptions are listed in Suppl. Table 3.

#### 404 **4.6 Acetylene reduction assay**

405 Acetylene reduction assays on *E. coli* transformed with control plasmids or modified MIT  
406 v2.1, along with controller plasmid N249 (Temme et al., 2012) were carried out according to  
407 Dilworth (1966) with the following modifications: Transformed JM109 cells were grown  
408 aerobically overnight at 37°C in LB medium with antibiotics to OD<sub>600</sub> = 1.0. The cultures  
409 were resuspended in induction medium (25 g/L Na<sub>2</sub>HPO<sub>4</sub>, 3 g/L KH<sub>2</sub>PO<sub>4</sub>, 0.25 g/L  
410 MgSO<sub>4</sub>·7H<sub>2</sub>O, 1 g/L NaCl, 0.1 g/L CaCl<sub>2</sub>·2H<sub>2</sub>O, 2.9 mg/L FeCl<sub>3</sub>, 0.25 mg/L Na<sub>2</sub>MoO<sub>4</sub>·2H<sub>2</sub>O,  
411 20 g/L sucrose, 0.015% serine, 0.5% casamino acids, 5 mg/L biotin, 10 mg/L para-  
412 aminobenzoic acid, 1 mM isopropyl β-D-thiogalactopyranoside (IPTG), transferred to air-  
413 tight culture flasks, and headspace sparged with argon gas. After 5 h incubation at 30°C, 200  
414 rpm, pure C<sub>2</sub>H<sub>2</sub> was injected into the headspace at 10% (vol.) and incubated for a further  
415 18 h. Production of ethylene was measured by gas chromatography with flame ionisation  
416 detection (GC-FID) using a RT-Alumina Bond/MAPD column (30 m x 0.32 mm ID x 5 μm  
417 film thickness) with a 5 m particle trap column fitted to the detector end of an Agilent 6890N  
418 GC. Parameters for the GC-FID were as follows: the inlet and FID were set to 200°C, carrier  
419 gas (He) velocity at 35 cm/s, and isothermal oven temperature set to 120°C.

#### 420 **4.7 *E. coli* total protein extraction**

421 Proteins were extracted from IPTG-induced *E. coli* JM109 containing modified MIT v2.1  
422 plasmid as described above for the acetylene reduction assay using 8 M urea and 2% SDS in  
423 100 mM Tris-HCl pH 8.5. Protein extracts were stored at -80°C prior to processing. Protein  
424 estimations were performed using the Bio-Rad microtiter Bradford protein assay (California,  
425 USA) according to the instructions provided (Bio-Rad version: Lit 33 Rev C) and  
426 measurements were made at 595 nm using a SpectraMax Plus. Bovine serum albumin (BSA)  
427 standard was used in the linear range 0.05 mg/mL to approximately 0.5 mg/mL. The BSA  
428 concentration was determined by high sensitivity amino acid analysis at Australian  
429 Proteomics Analysis Facility (Sydney, Australia).



#### 430 **4.8 *E. coli* tryptic digestion**

431 Protein was subjected to filter-aided sample preparation (Wiśniewski et al., 2011). In brief,  
432 100  $\mu\text{L}$  (~200  $\mu\text{g}$ ) of protein was diluted in 100  $\mu\text{L}$  of 8 M urea, 100 mM Tris-HCl, pH 8.5  
433 (UA buffer) and loaded onto a 10 kDa molecular weight cut-off (MWCO) centrifugal filter  
434 (Merck Millipore, Australia) and centrifuged at 20,800  $\times g$  for 15 min at 22°C. The filter (and  
435 protein >10 kDa) was washed with 200  $\mu\text{L}$  of UA buffer and centrifuged at 20,800  $\times g$  for 15  
436 min at 22°C. To reduce the protein on the filter, dithiothreitol (50 mM, 200  $\mu\text{L}$ ) was added  
437 and the solution incubated at room temperature for 50 min with shaking. The filter was  
438 washed with two 200  $\mu\text{L}$  volumes of UA buffer with centrifugation (20,800  $\times g$ , 15 min). For  
439 cysteine alkylation, iodoacetamide (IAM) (100  $\mu\text{L}$ , 50 mM IAM in UA buffer) was added  
440 and incubated in the dark for 30 min at 22°C before centrifugation (20,800  $\times g$ , 15 min) and  
441 washed with two 200  $\mu\text{L}$  volumes of UA buffer with centrifugation (20,800  $\times g$ , 15 min)  
442 followed by two subsequent wash/centrifugation steps with 200  $\mu\text{L}$  of 50 mM ammonium  
443 bicarbonate. The trypsin (sequencing grade, Promega, Alexandria, Australia) solution (200  
444  $\mu\text{L}$ , 20  $\mu\text{g}/\text{mL}$  (4  $\mu\text{g}$ ) in 50 mM ammonium bicarbonate and 1 mM  $\text{CaCl}_2$ ) was loaded onto  
445 the filter and incubated for 18 h at 37°C in a wet chamber. The tryptic peptides were collected  
446 by centrifugation (20,800  $\times g$ , 15 min) followed by an additional wash with 200  $\mu\text{L}$  of 50 mM  
447 ammonium bicarbonate. The combined filtrates were lyophilized and stored at -20°C.

#### 448 **4.9 Global proteomic profiling**

449 The digested peptides were reconstituted in 50  $\mu\text{L}$  of 1% formic acid (FA) and  
450 chromatographic separation (4  $\mu\text{L}$ ) on an Ekspert nanoLC415 (Eksigent, Dublin, CA, U.S.A.)  
451 directly coupled to a TripleTOF 6600 liquid chromatography tandem mass spectrometry (LC-  
452 MS/MS, SCIEX, Redwood City, CA, USA). The peptides were desalted for 5 min on a  
453 ChromXP C18 (3  $\mu\text{m}$ , 120  $\text{\AA}$ , 10 mm  $\times$  0.3 mm) trap column at a flow rate of 10  $\mu\text{L}/\text{min}$   
454 0.1% FA, and separated on a ChromXP C18 (3  $\mu\text{m}$ , 120  $\text{\AA}$ , 150 mm  $\times$  0.3 mm) column at a  
455 flow rate of 5  $\mu\text{L}/\text{min}$  at 30°C. A linear gradient from 3-25% solvent B over 68 min was  
456 employed followed by: 5 min from 25% B to 35% B; 2 min 35% B to 80% B; 3 min at 80%  
457 B, 80-3% B, 1 min; and 8 min re-equilibration. The solvents were: (A) 5% dimethylsulfoxide  
458 (DMSO), 0.1% formic acid (FA), 94.9% water; (B) 5% DMSO, 0.1% FA, 90% acetonitrile,  
459 4.9% water. The instrument parameters were: ion spray voltage 5500 V, curtain gas 25 psi,  
460 GS1 15 psi and GS2 15 psi, heated interface 150°C. Data were acquired in information-  
461 dependent acquisition mode comprising a time-of-flight (TOF)-MS survey scan followed by

462 30 MS/MS, each with a 40 ms accumulation time. First stage MS analysis was performed in  
463 positive ion mode, mass range  $m/z$  400–1250 and 0.25 s accumulation time. Tandem mass  
464 spectra were acquired on precursor ions >150 counts/s with charge state 2–5 and dynamic  
465 exclusion for 15 s with a 100 ppm mass tolerance. Spectra were acquired over the mass range  
466 of  $m/z$  100–1500 using the manufacturer's rolling collision energy based on the size and  
467 charge of the precursor ion. Protein identification was undertaken using ProteinPilot™ 5.0  
468 software (SCIEX) with searches conducted against the *E. coli* subset of the Uniprot-  
469 SwissProt database (2018/08) appended with a custom nitrogenase (Nif+Mit2Nif) database  
470 including the control chloramphenicol acetyltransferase (CAT/P62577) and a contaminant  
471 database (Common Repository of Adventitious Proteins). The total number of proteins in the  
472 custom database was 5410.

#### 473 **4.10 Identification of prototypic peptides for nitrogenase proteins in *E. coli***

474 From the identified peptides, two NifM peptides (DAFAPLAQR and DYLWQQSQQR) that  
475 were fully tryptic, contained no unusual cleavages and/or modifications and showed high  
476 response in the MS (as judged by peak intensity) were selected for multiple reaction  
477 monitoring scanning to confirm the detection of the nitrogenase (NifM) proteins in the *E. coli*  
478 JM109 expressions.

#### 479 **4.11 Targeted liquid chromatography – multiple reaction monitoring – mass** 480 **spectrometry (LC-MRM-MS)**

481 Reduced and alkylated tryptic peptides (5  $\mu$ L) were chromatographically separated on a  
482 Kinetex C18 column (2.1 mm x 100 mm, Phenomenex) using a linear gradient of 5–45%  
483 acetonitrile (in 0.1% formic acid) over 10 min at a flow rate of 400  $\mu$ L/min. The eluent from  
484 the Shimadzu Nexera UHPLC was directed to a QTRAP 6500 mass spectrometer (SCIEX)  
485 equipped with a TurboV ionisation source operated in positive ion mode for data acquisition  
486 and analysis. The MS parameters were as follows: ion spray voltage, 5500 V; curtain gas, 35;  
487 GS1, 35; GS2, 40; source temperature, 500°C; declustering potential, 70 V; and entrance  
488 potential, 10 V. Peptides were fragmented in the collision cell with nitrogen gas using rolling  
489 collision energy dependent on the size and charge on the size and charge of the precursor ion.  
490 Relative quantitation using scheduled multiple reaction monitoring (MRM) scanning  
491 experiments (MRM transition peptide information provided in Supplementary Table 1) with a  
492 40 second detection window around the expected retention time (RT) and a 0.3 second cycle

493 time. Data were acquired using Analyst v1.7 software. Peak areas of four MRM transitions  
494 were integrated using Skyline (MacLean, Bioinformatics 2010) wherein all transitions were  
495 required to co-elute with a signal-to-noise (S/N) > 3 and intensity >1000 counts per second  
496 (cps) for detection.

#### 497 **4.12 Identification of peptides for chloramphenicol acetyltransferase protein**

498 Chloramphenicol acetyltransferase (CAT/P62577) enzyme is an effector of chloramphenicol  
499 resistance in bacteria and is expressed in all *E. coli* JM109 transformed with unmodified or  
500 modified MIT v2.1. This protein was selected as a control for protein expression. Three  
501 peptides (four transitions/peptide) were selected to screen the expression of CAT  
502 (ITGYTTVDISQWHR, LMNAHPEFR, and YYTQGDK).

503

#### 504 **5 Conflict of Interest**

505 The authors declare that the research was conducted in the absence of any commercial or  
506 financial relationships that could be construed as a potential conflict of interest.

507

#### 508 **6 Author Contributions**

509 SO, CG, RA, CW conceived the project and designed the experiments. SO, CG, RA, AM,  
510 DH, VG, EJ, KB, MC conducted the experiments. All authors contributed to writing the  
511 manuscript.

512

#### 513 **7 Funding**

514 This project was co-funded by CSIRO and Cotton Seed Distributors Ltd..

515

516 **8 Acknowledgments**

517 We thank Rob Defeyter, Trevor Rapson and Xue-Rong Zhou for their critical reviews of this  
518 article.

519

520 **9 References**

- 521 Allen, R. S., Tilbrook, K., Warden, A. C., Campbell, P. C., Rolland, V., Singh, S. P., et al.  
522 (2017). Expression of 16 Nitrogenase Proteins within the Plant Mitochondrial Matrix.  
523 *Front. Plant Sci.* 8. doi:10.3389/fpls.2017.00287.
- 524 Bally, J., Jung, H., Mortimer, C., Naim, F., Philips, J. G., Hellens, R., et al. (2018). The Rise  
525 and Rise of *Nicotiana benthamiana* : A Plant for All Reasons.
- 526 Burén, S., Jiang, X., López-Torrejón, G., Echavarri-Erasun, C., and Rubio, L. M. (2017).  
527 Purification and In Vitro Activity of Mitochondria Targeted Nitrogenase Cofactor  
528 Maturase NifB. *Front. Plant Sci.* 8. doi:10.3389/fpls.2017.01567.
- 529 Burén, S., Pratt, K., Jiang, X., Guo, Y., Jimenez-Vicente, E., Echavarri-Erasun, C., et al.  
530 (2019). Biosynthesis of the nitrogenase active-site cofactor precursor NifB-co in  
531 *Saccharomyces cerevisiae*. *Proc. Natl. Acad. Sci.*, 201904903.  
532 doi:10.1073/pnas.1904903116.
- 533 Burén, S., Young, E. M., Sweeny, E. A., Lopez-Torrejón, G., Veldhuizen, M., Voigt, C. A.,  
534 et al. (2017). Formation of Nitrogenase NifDK Tetramers in the Mitochondria of  
535 *Saccharomyces cerevisiae*. *ACS Synth. Biol.* 6, 1043–1055.  
536 doi:10.1021/acssynbio.6b00371.
- 537 Curatti, L., and Rubio, L. M. (2014). Challenges to develop nitrogen-fixing cereals by direct  
538 nif-gene transfer. *Plant Sci.* 225, 130–137. doi:10.1016/j.plantsci.2014.06.003.
- 539 de Kok, S., Stanton, L. H., Slaby, T., Durot, M., Holmes, V. F., Patel, K. G., et al. (2014).  
540 Rapid and reliable DNA assembly via ligase cycling reaction. *ACS Synth. Biol.* 3, 97–  
541 106. doi:10.1021/sb4001992.
- 542 Deistung, J., Cannon, F. C., Cannon, M. C., Hill, S., and Thorneley, R. N. (1985). Electron  
543 transfer to nitrogenase in *Klebsiella pneumoniae*: NifF gene cloned and the gene  
544 product, a flavodoxin, purified. *Biochem. J.* 231, 743–753. doi:10.1042/bj2310743.
- 545 Dilworth, M. J. (1966). Acetylene reduction by nitrogen-fixing preparations from *Clostridium*  
546 *pasteurianum*. *BBA - Gen. Subj.* doi:10.1016/0304-4165(66)90383-7.

- 547 Einsle, O., Tezcan, F. A., Andrade, S. L. A., Schmid, B., Yoshida, M., Howard, J. B., et al.  
548 (2002). Nitrogenase MoFe-Protein at 1.16 Å Resolution: A Central Ligand in the FeMo-  
549 Cofactor. *Science* 297, 1696–1701.
- 550 Glibert, P. M., Maranger, R., Sobota, D. J., and Bouwman, L. (2014). The Haber Bosch-  
551 harmful algal bloom (HB-HAB) link. *Environ. Res. Lett.* 9. doi:10.1088/1748-  
552 9326/9/10/105001.
- 553 Howard, K. S., McLean, P. A., Hansen, F. B., Lemley, P. V., Koblan, K. S., and Orme-  
554 Johnson, W. H. (1986). Klebsiella pneumoniae nifM gene product is required for  
555 stabilization and activation of nitrogenase iron protein in Escherichia coli. *J. Biol. Chem.*  
556 261, 772–778.
- 557 Hu, Y., and Ribbe, M. W. (2013). Nitrogenase assembly. *Biochim. Biophys. Acta - Bioenerg.*  
558 1827, 1112–1122. doi:10.1016/j.bbabi.2012.12.001.
- 559 Huang, S., Taylor, N. L., Whelan, J., and Millar, A. H. (2009). Refining the Definition of  
560 Plant Mitochondrial Presequences through Analysis of Sorting Signals, N-Terminal  
561 Modifications, and Cleavage Motifs. *PLANT Physiol.* 150, 1272–1285.  
562 doi:10.1104/pp.109.137885.
- 563 Jang, S. B., Seefeldt, L. C., and Peters, J. W. (2000). Insights into nucleotide signal  
564 transduction in nitrogenase: Structure of an iron protein with MgADP bound.  
565 *Biochemistry* 39, 14745–14752. doi:10.1021/bi001705g.
- 566 Kim, J., and Rees, D. C. (1992). Crystallographic structure of the nitrogenase iron protein  
567 from Azotobacter vinelandii. *Science* (80-. ). 257, 1653–1659.  
568 doi:10.1126/science.1529353.
- 569 Lee, S., Lee, D. W., Yoo, Y.-J., Duncan, O., Oh, Y. J., Lee, Y. J., et al. (2012). Mitochondrial  
570 Targeting of the Arabidopsis F1-ATPase  $\gamma$ -Subunit via Multiple Compensatory and  
571 Synergistic Presequence Motifs. *Plant Cell* 24, 5037–5057. doi:10.1105/tpc.112.105361.
- 572 Lei, S., Pulakat, L., and Gavini, N. (1999). Regulated expression of the nifM of Azotobacter  
573 vinelandii in response to molybdenum and vanadium supplements in Burk's nitrogen-  
574 free growth medium. *Biochem. Biophys. Res. Commun.* 264, 186–190.  
575 doi:10.1006/bbrc.1999.1507.
- 576 López-Torrejón, G., Jiménez-Vicente, E., Buesa, J. M., Hernandez, J. A., Verma, H. K., and  
577 Rubio, L. M. (2016). Expression of a functional oxygen-labile nitrogenase component in  
578 the mitochondrial matrix of aerobically grown yeast. *Nat. Commun.* 7.  
579 doi:10.1038/ncomms11426.
- 580 MacMillan, T., Ziemienowicz, A., Jiang, F., Eudes, F., and Kovalchuk, I. (2019). Gene  
581 delivery into the plant mitochondria via organelle-specific peptides. *Plant Biotechnol.*  
582 *Rep.* 13, 11–23. doi:10.1007/s11816-018-0502-y.
- 583 Martínez-argudo, I., Little, R., Shearer, N., Johnson, P., and Dixon, R. (2004). Martínez-  
584 Argudo 2004 nifA. 186, 1–10. doi:10.1128/JB.186.3.601.

- 585 Muller, M., Mentel, M., van Hellemond, J. J., Henze, K., Woehle, C., Gould, S. B., et al.  
586 (2012). Biochemistry and Evolution of Anaerobic Energy Metabolism in Eukaryotes.  
587 *Microbiol. Mol. Biol. Rev.* 76, 444–495. doi:10.1128/mmbr.05024-11.
- 588 Murcha, M. W., Huang, T., and Whelan, J. (1999). Import of precursor proteins into  
589 mitochondria from soybean tissues during development. *FEBS Lett.* 464, 53–59.  
590 doi:10.1016/S0014-5793(99)01674-9.
- 591 Oldroyd, G. E. D., and Dixon, R. (2014). Biotechnological solutions to the nitrogen problem.  
592 *Curr. Opin. Biotechnol.* 26, 19–24. doi:10.1016/j.copbio.2013.08.006.
- 593 Poole, A. M., and Gribaldo, S. (2014). Eukaryotic origins: How and when was the  
594 mitochondrion acquired? *Cold Spring Harb. Perspect. Biol.* 6.  
595 doi:10.1101/cshperspect.a015990.
- 596 Poza-carrión, C., Echavarri-erasun, C., Rubio, L. M., and Bacteria, N. (2015). Expression and  
597 Regulation of Nitrogen Fixation Genes and Nitrogenase Regulation of nif Gene  
598 Expression in *Azotobacter vinelandii*. *Biol. Nitrogen Fixat.* 1, 101–107.
- 599 Ribbe, M. W., Hu, Y., Hodgson, K. O., and Hedman, B. (2014). Biosynthesis of nitrogenase  
600 metalloclusters. *Chem. Rev.* 114, 4063–4080. doi:10.1021/cr400463x.
- 601 Santi, C., Bogusz, D., and Franche, C. (2013). Biological nitrogen fixation in non-legume  
602 plants. *Ann. Bot.* 111, 743–767. doi:10.1093/aob/mct048.
- 603 Schmidt, T. G. M., Batz, L., Bonet, L., Carl, U., Holzapfel, G., Kiem, K., et al. (2013).  
604 Development of the Twin-Strep-tag® and its application for purification of recombinant  
605 proteins from cell culture supernatants. *Protein Expr. Purif.* 92, 54–61.  
606 doi:10.1016/j.pep.2013.08.021.
- 607 Shah, V. K., Stacey, G., and Brill, W. J. (1983). Electron transport to nitrogenase. *J. Biol.*  
608 *Chem.* 258, 12064–12068.
- 609 Smanski, M. J., Bhatia, S., Zhao, D., Park, Y. J., Woodruff, L. B. A., Giannoukos, G., et al.  
610 (2014). Functional optimization of gene clusters by combinatorial design and assembly.  
611 *Nat. Biotechnol.* 32, 1241–1249. doi:10.1038/nbt.3063.
- 612 Smil, V. (1999). Detonator of the population explosion. *Nature.* doi:10.1038/22672.
- 613 Spatzal, T., Aksoyoglu, M., Zhang, L., Andrade, S. L. A., Schleicher, E., Weber, S., et al.  
614 (2011). Evidence for Interstitial Carbon in. 334. doi:10.1126/science.1214025.
- 615 Temme, K., Zhao, D., and Voigt, C. A. (2012). Refactoring the nitrogen fixation gene cluster  
616 from *Klebsiella oxytoca*. *Proc. Natl. Acad. Sci.* 109, 7085–7090.  
617 doi:10.1073/pnas.1120788109.
- 618 Varshavsky, A. (2011). The N-end rule pathway and regulation by proteolysis. *Protein Sci.*  
619 20, 1298–1345. doi:10.1002/pro.666.



- 620 Vitousek, Peter M; Aber, John D; Howarth, Robert W; Likens, Gene E; Matson, Pamela A;  
621 Schindler, David W, Schlesinger, William H; Tilman, D. G. (1997). Human alteration of  
622 the global nitrogen cycle: Source and consequences. *Ecol. Appl.* 7, 737–750.
- 623 Voos, W., von Ahsen, O., Müller, H., Guiard, B., Rassow, J., and Pfanner, N. (1996).  
624 Differential requirement for the mitochondrial Hsp70-Tim44 complex in unfolding and  
625 translocation of preproteins. *EMBO J.* 15, 2668–2677. doi:10.1002/j.1460-  
626 2075.1996.tb00627.x.
- 627 Voos, W., Gambill, B. D., Guiard, B., Pfanner, N., and Craig, E. A. (1993). Presequence and  
628 mature part of preproteins strongly influence the dependence of mitochondrial protein  
629 import on heat shock protein 70 in the matrix. *J. Cell Biol.* 123, 119–126.  
630 doi:10.1083/jcb.123.1.119.
- 631 Weber, E., Engler, C., Gruetzner, R., Werner, S., and Marillonnet, S. (2011). A modular  
632 cloning system for standardized assembly of multigene constructs. *PLoS One* 6.  
633 doi:10.1371/journal.pone.0016765.
- 634 Wilcox, A. J., Choy, J., Bustamante, C., and Matouschek, A. (2005). Effect of protein  
635 structure on mitochondrial import. *Proc. Natl. Acad. Sci.* 102, 15435–15440.  
636 doi:10.1073/pnas.0507324102.
- 637 Wisniewski, Jacek R; Zielinska, Dorota F; Mann, M. (2011). wisniewski 2011 proteomics  
638 filter aided sample prep.pdf. *Anal. Biochem.* 410, 307–309.  
639 doi:<https://doi.org/10.1016/j.ab.2010.12.004>.
- 640 Yang, J., Xie, X., Xiang, N., Tian, Z.-X., Dixon, R., and Wang, Y.-P. (2018). Polyprotein  
641 strategy for stoichiometric assembly of nitrogen fixation components for synthetic  
642 biology. *Proc. Natl. Acad. Sci.*, 201804992. doi:10.1073/pnas.1804992115.

643

## 644 10 Tables

645 **Table 1.** Effect of pFA $\gamma$ 51 nine amino acid ‘scar’ (scar9) peptide translationally fused to  
646 individual Nif proteins on nitrogenase function. Values are presented as % acetylene  
647 reduction activity compared to MIT v2.1. pB-ori, negative control containing  
648 *nifBQFUSVWZM*;  $\Delta nifM$ , NifM coding sequence removed from MIT v2.1; NifK::HA, HA  
649 epitope tag fused to the C-terminus of NifK; S.D., standard deviation (n=2-6).

| Construct   | % activity of<br>MIT v2.1 | S.D. |
|-------------|---------------------------|------|
| MIT v2.1    | 100                       | 18   |
| scar9::NifJ | 309                       | 86   |

|                              |     |    |
|------------------------------|-----|----|
| scar9::NifQ                  | 158 | 22 |
| scar9::NifH                  | 148 | 15 |
| scar9::NifB                  | 144 | 34 |
| scar9::NifF                  | 131 | 8  |
| scar9::NifD                  | 110 | 9  |
| scar9::NifW                  | 95  | 8  |
| scar9::NifV                  | 81  | 11 |
| scar9::NifU                  | 80  | 4  |
| scar9::NifY                  | 65  | 4  |
| scar9::NifK                  | 60  | 10 |
| scar9::NifN                  | 46  | 9  |
| scar9::NifE                  | 42  | 1  |
| scar9::NifS                  | 41  | 1  |
| scar9::NifZ                  | 37  | 18 |
| scar9::NifM                  | 9   | 1  |
| <i>ΔnifM</i>                 | 6   | 4  |
| NifK::HA                     | 0   | 1  |
| pB-ori ( <i>ΔnifHDKENJ</i> ) | 0   | 0  |

---

650

## 651 11 Figure Legends

652 **Fig. 1:** Schematic of the workflow to assess key features of Nif proteins targeted to plant  
653 mitochondria. Translational fusions of the MTP to Nif proteins are expressed in  
654 *N. benthamiana* leaf to test preprotein processing and solubility. Scar::Nif protein fusions are  
655 expressed in *E. coli* for function testing by acetylene reduction. MTP, ‘scar’ peptide, Nif not  
656 to scale. MTP, mitochondrial targeting peptide; MPP, mitochondrial processing peptidase.

657

658 **Fig. 2:** Design of the pFA $\gamma$ 51 MTP and assessment of its cleavage when fused to different  
659 Nif proteins expressed in plants. **(A)** Schematic of the truncation of the N-terminal amino  
660 acid sequence of the *A. thaliana* F1 ATPase  $\gamma$  subunit from 77 to 51 residues. The 26 amino  
661 acid residues in the orange section of pFA $\gamma$  were removed. MTP, Nif, HA epitope tag are not  
662 to scale. MTP, mitochondrial targeting peptide; MPP, mitochondrial processing peptidase.  
663 **(B)** Western blot analysis ( $\alpha$ -HA) of individual pFA $\gamma$ 51::Nif::HA, pFA $\gamma$ 51::HA::NifK,  
664 6 $\times$ His::Nif::HA and 6 $\times$ His::HA::NifK proteins transiently expressed in *N. benthamiana* leaf.  
665 Black dots point to the size of the correctly processed pFA $\gamma$ 51::Nif::HA protein. C,  
666 cytoplasmic expression; M, mitochondrial targeted. Panels of individual Nif proteins shown  
667 in B were extracted from full blot images presented in Suppl. Fig. 2.

668

669 **Fig. 3:** Assessment of the solubility of pFA $\gamma$ 51::Nif::HA and pFA $\gamma$ 51::HA::NifK proteins in  
670 plants. Western blot analysis ( $\alpha$ -HA) of individual pFA $\gamma$ 51::Nif::HA and pFA $\gamma$ 51::HA::NifK  
671 proteins transiently expressed in *N. benthamiana* leaf. Black dots point to the size of the  
672 processed pFA $\gamma$ 51::Nif::HA and pFA $\gamma$ 51::HA::NifK protein. T, total protein; I, insoluble  
673 fraction; S, soluble fraction. Panels of individual Nif proteins shown were extracted from full  
674 blot images presented in Suppl. Fig. 3.

675

676 **Fig. 4:** Representation of a modified MIT v2.1 to test function in *E. coli* strain JM109. This  
677 example shows a scar9 motif translationally fused to NifH. One scar9::Nif was tested per  
678 expression plasmid.

679

680

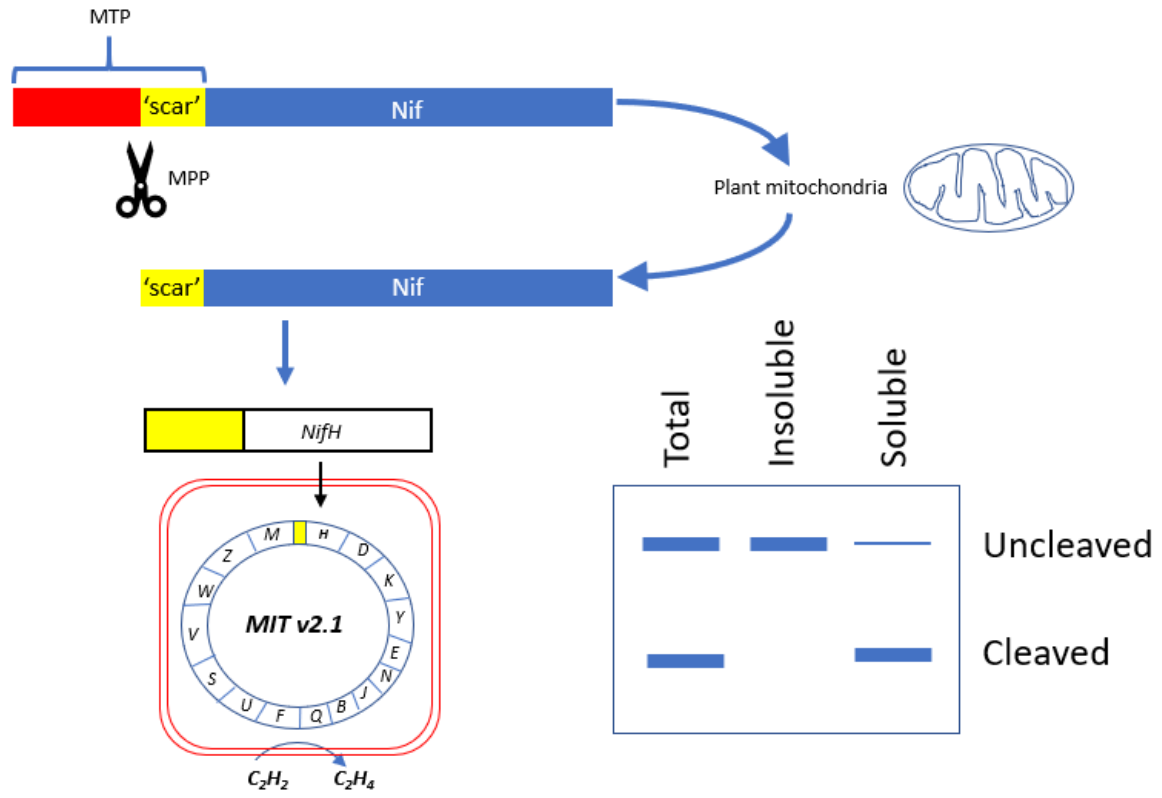

681

682

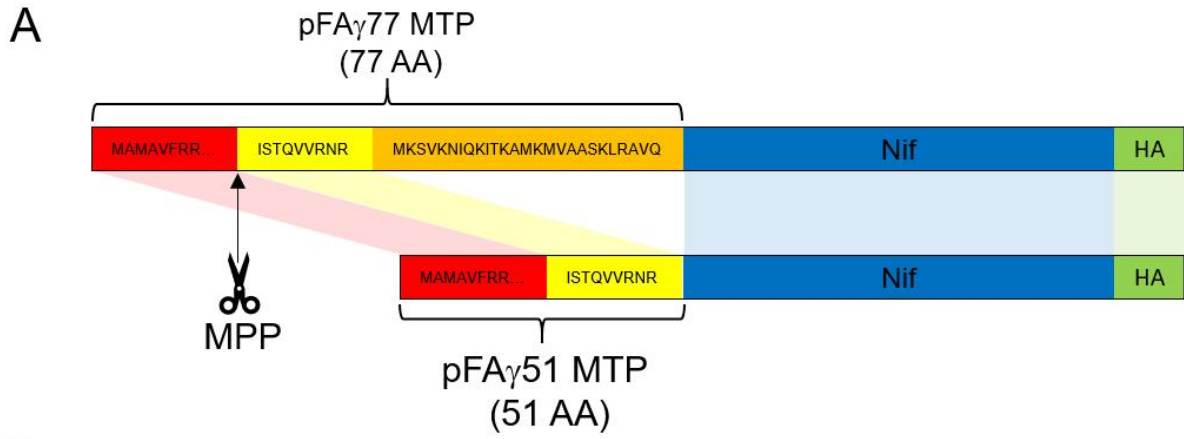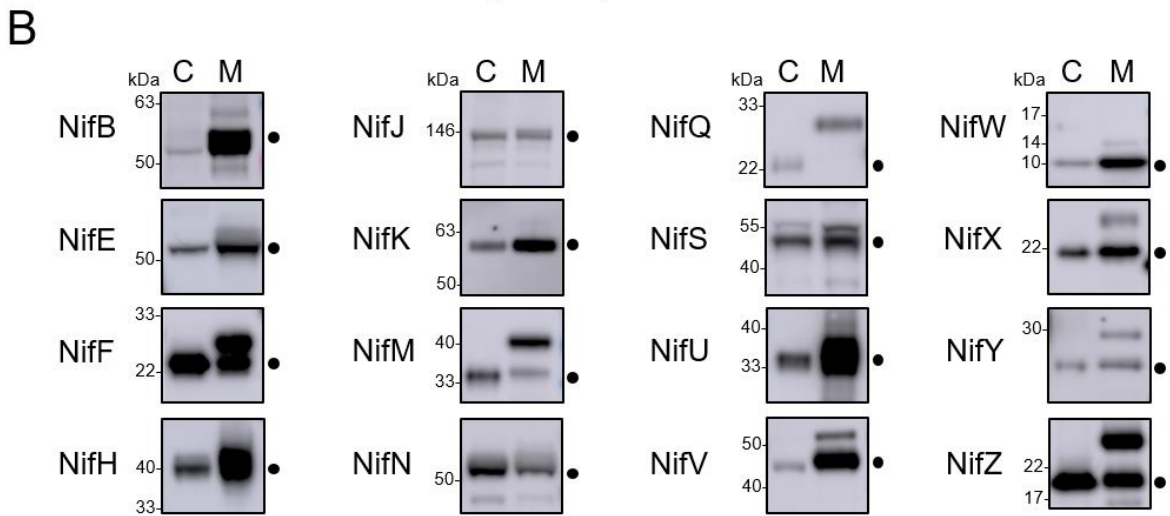

683

684

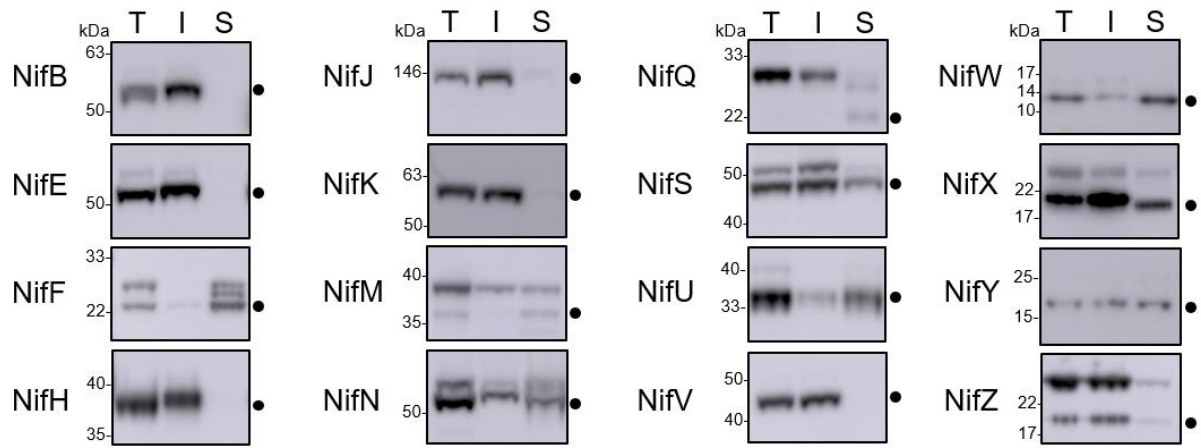



686

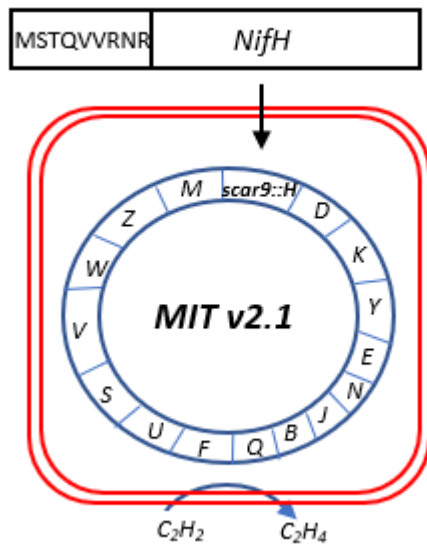

687

688

689 **12 Supplementary material**

690 **Suppl. Fig. 1:** Purification of NifU from plant leaves and sample preparation for proteomic  
691 analysis. **(A)** Coomassie stain of the supernatant, flow through and eluate from the  
692 StrepTactin purification. A contaminating band (\*) was observed, most likely corresponding  
693 to Rubisco (large chain). **(B)** Western blot analysis of the same samples with a StrepTactin-  
694 HRP conjugate antibody. **(C)** Coomassie gel after excision of the NifU gel slice for  
695 proteomic analysis.

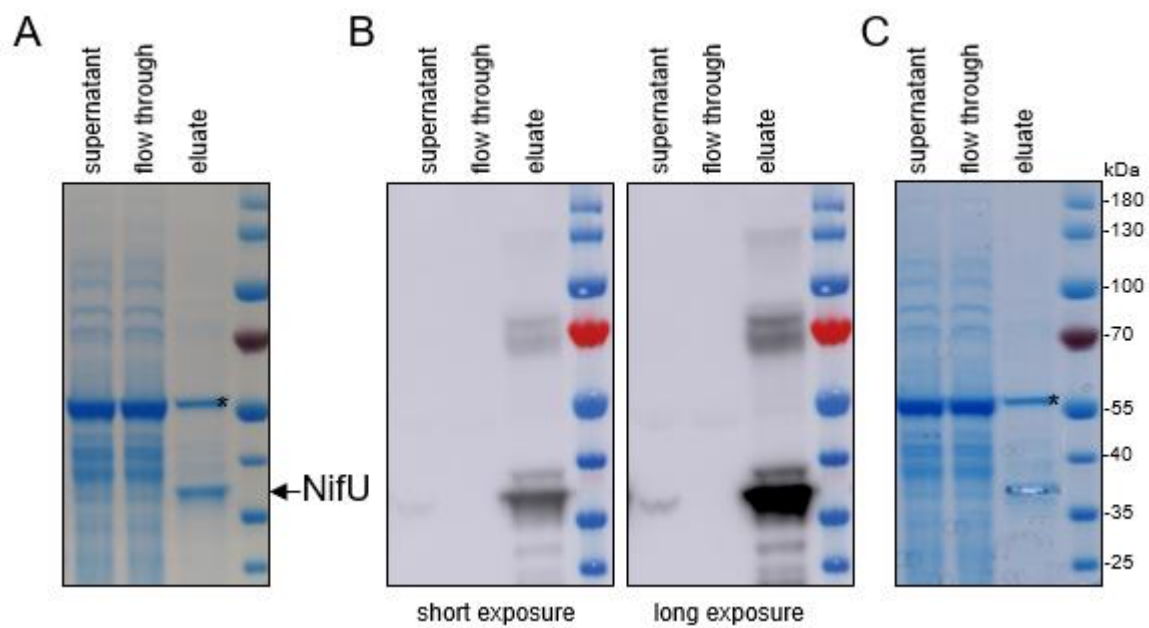

696

697

698 **Suppl. Fig. 2:** Assessment of MTP cleavage of pFA $\gamma$ 51::Nif::HA proteins. Whole blot  
699 images of the Western blot analysis of individual pFA $\gamma$ 51::Nif::HA, pFA $\gamma$ 51::HA::NifK,  
700 6 $\times$ His::Nif::HA and 6 $\times$ His::HA::NifK proteins transiently expressed in *Nicotiana*  
701 *benthamiana* leaf. C, cytoplasmic expression; M, mitochondrially targeted. Due to  
702 considerable variation in abundance of mitochondrially located proteins and cytoplasmic  
703 equivalents, mitochondrially located NifB, NifE, NifF, NifH, NifK, unprocessed NifM, NifN,  
704 NifU, NifV, NifW, NifX and NifZ in these images are overexposed. Cytoplasmic NifF and  
705 NifZ are also overexposed.

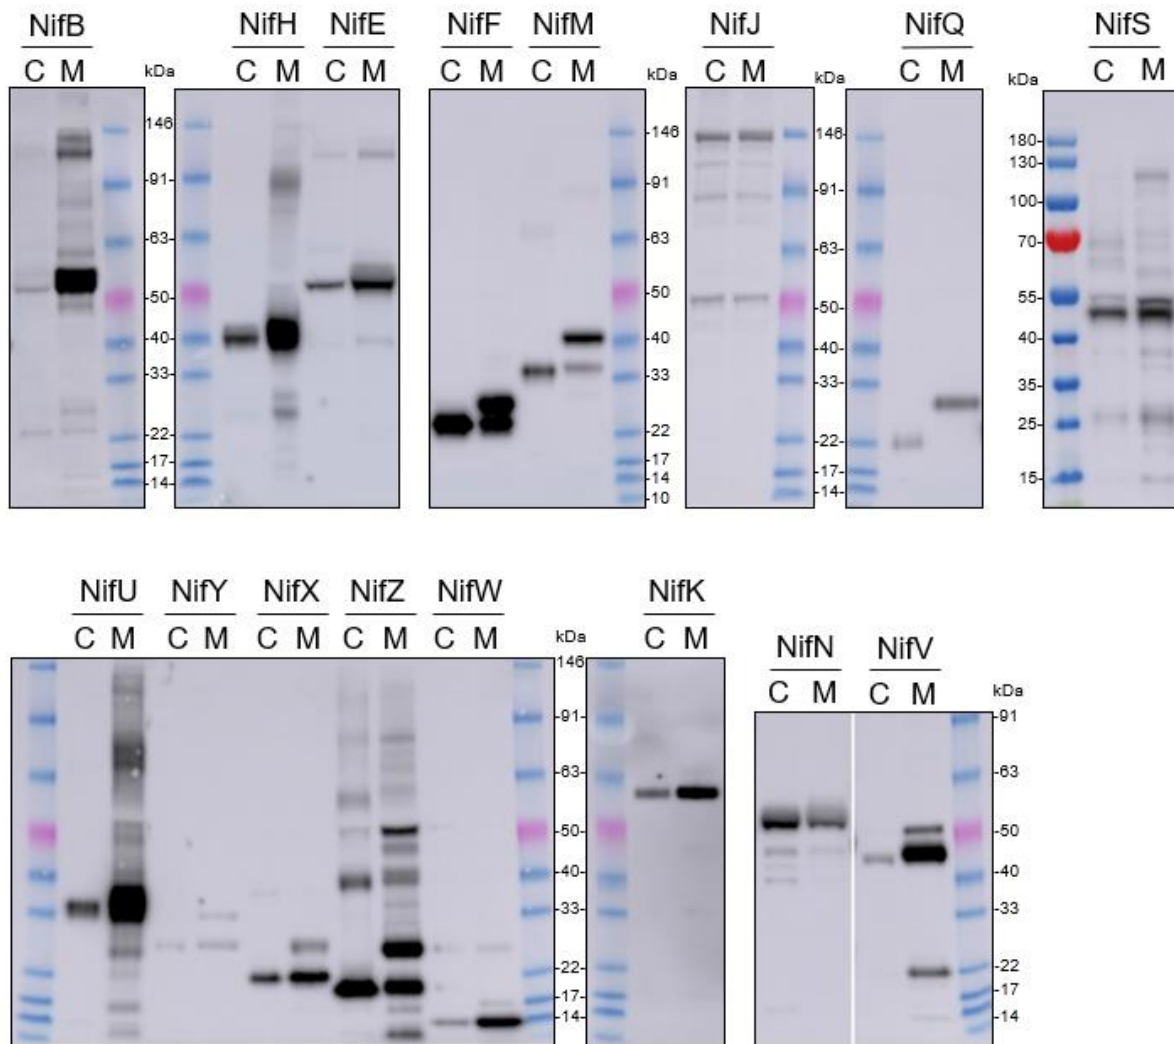

706

707

708 **Suppl. Fig. 3:** Whole blot images of the Western blot analysis ( $\alpha$ -HA) of individual  
709 pFA $\gamma$ 51::Nif::HA and pFA $\gamma$ 51::HA::NifK proteins transiently expressed in *N. benthamiana*  
710 leaf. T, total protein; I, insoluble fraction; S, soluble fraction.

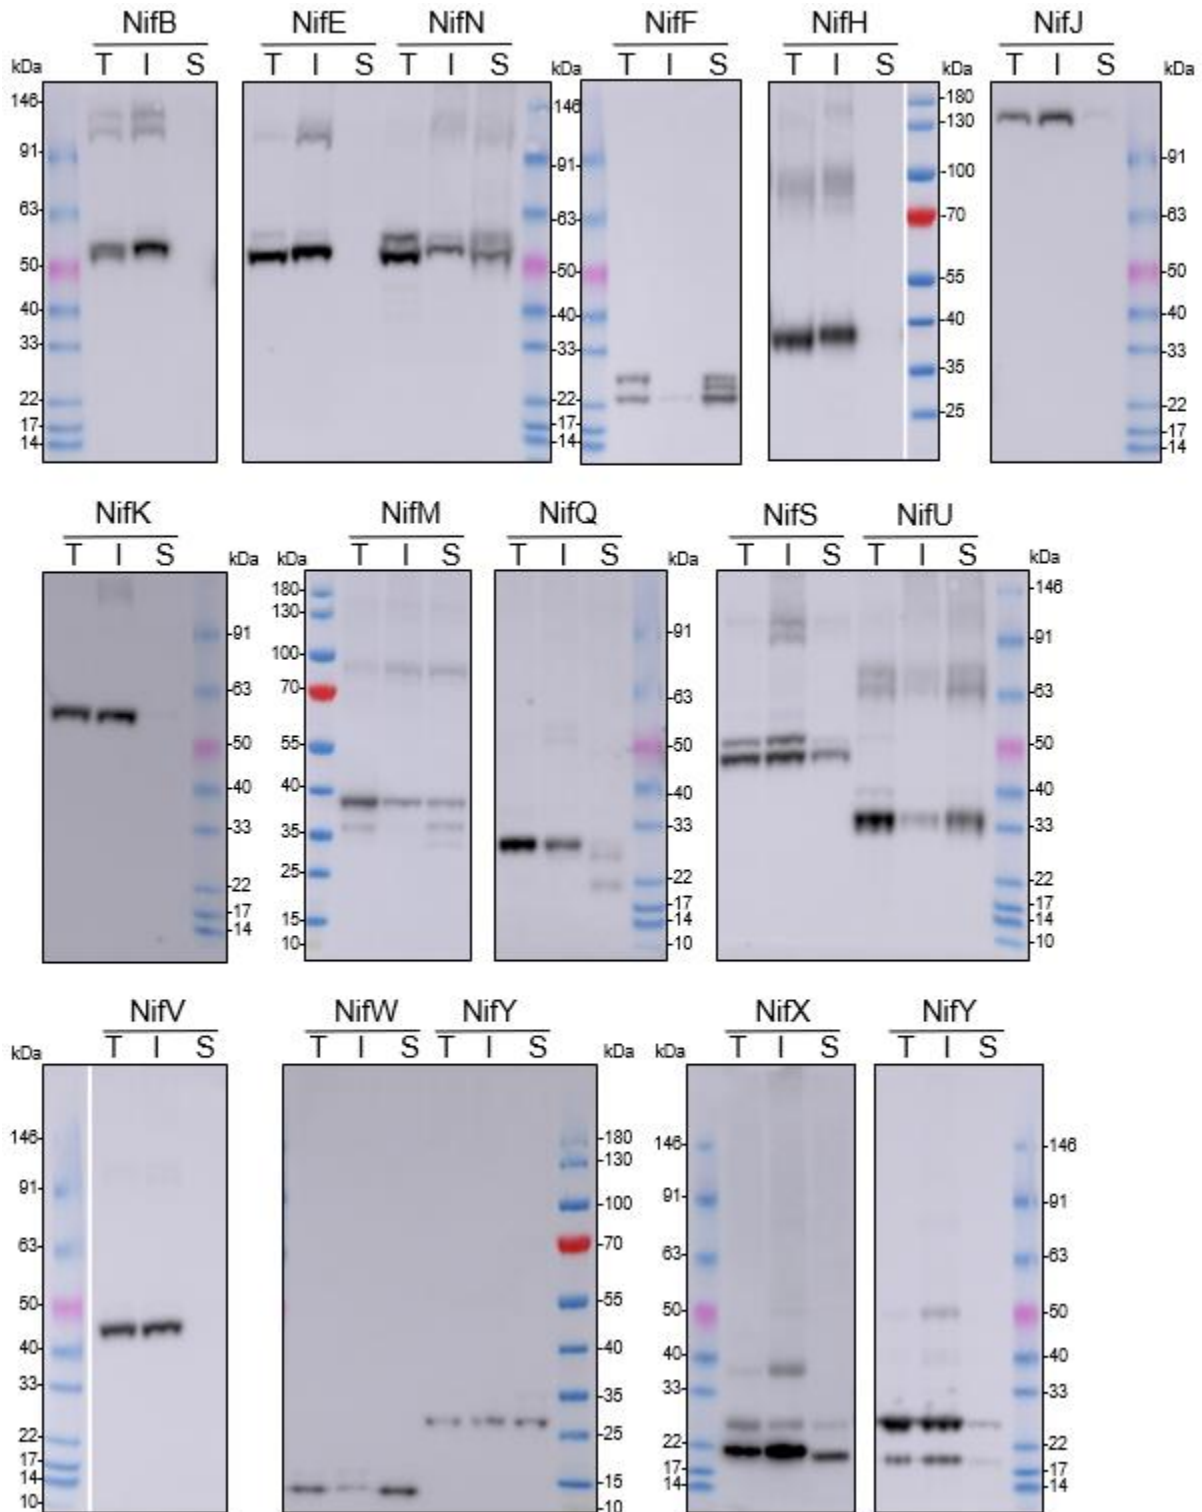

711

712 **Suppl. Fig. 4:** Whole blot images of Western blot analysis ( $\alpha$ -HA) of individual  
713 pFA $\gamma$ 51::Nif::HA and pFA $\gamma$ 51::HA::NifK proteins transiently expressed in *N. benthamiana*  
714 leaf. Proteins were extracted under anaerobic conditions. T, total protein; I, insoluble fraction;  
715 S, soluble fraction.

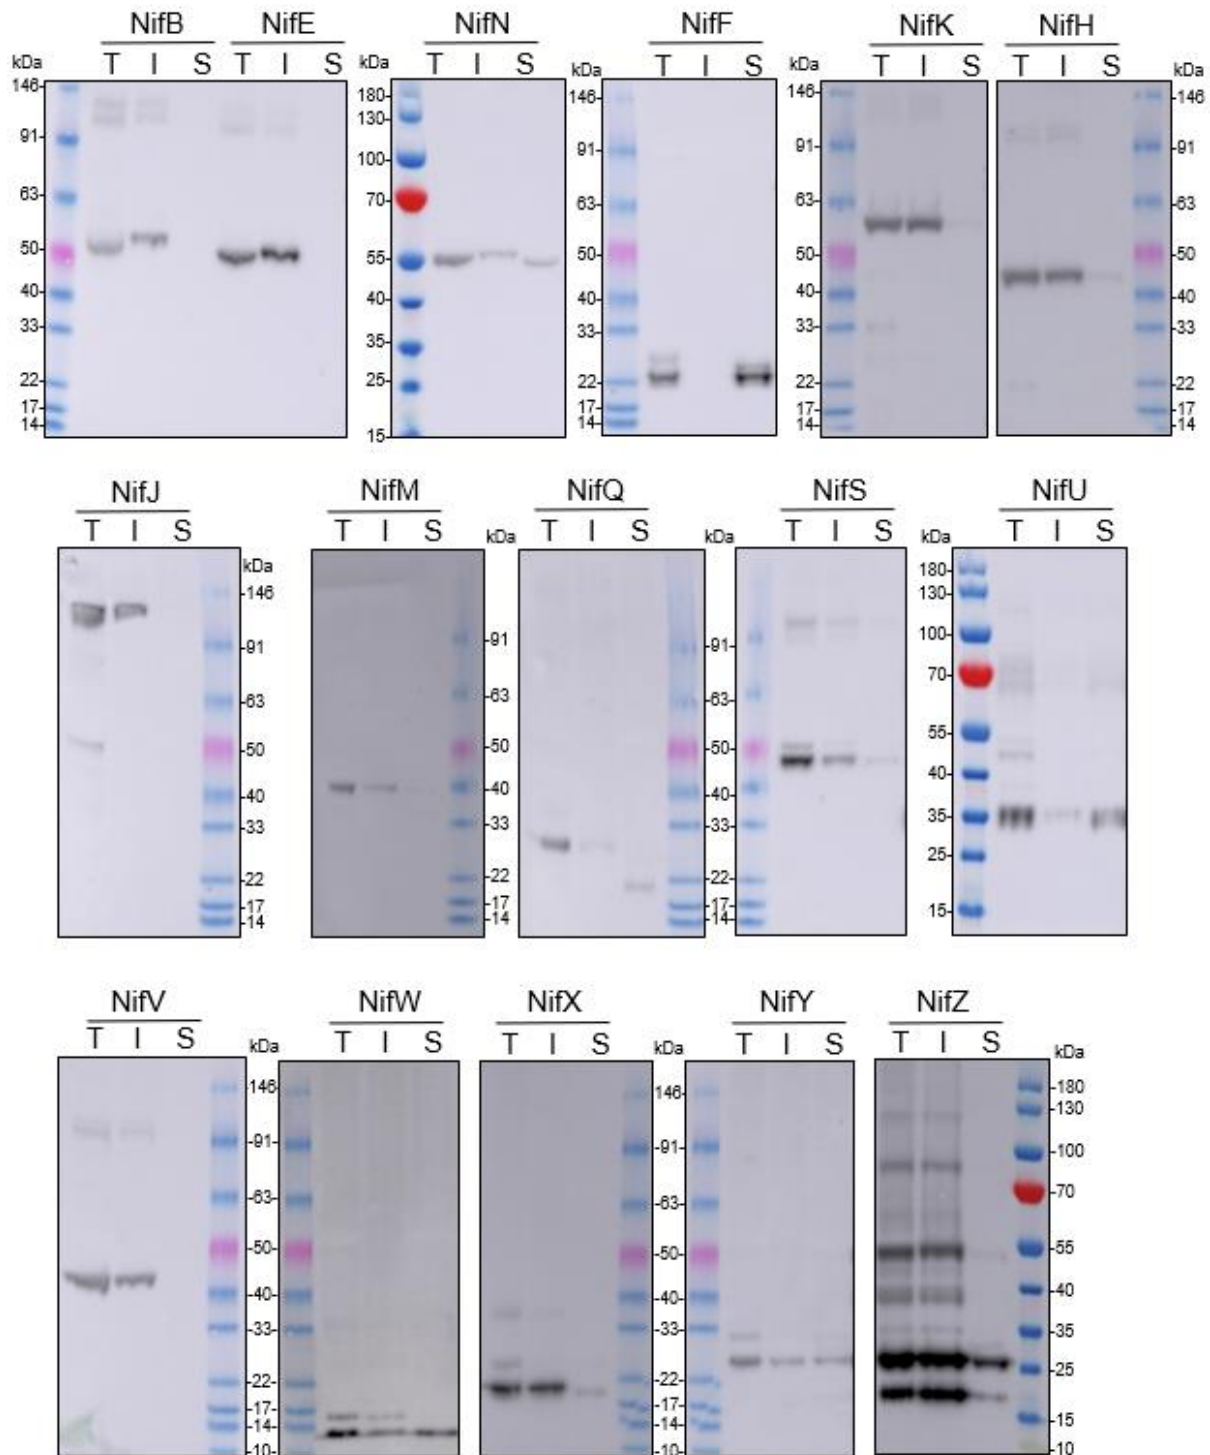

716

717 **Suppl. Fig. 5:** Relative expression levels of chloramphenicol acetyltransferase peptide  
718 Y<sub>1</sub>YTQGDK (CAT) and Nif peptides in *E. coli* JM109 expressing unmodified and modified  
719 MIT v2.1 plasmids. Positive, positive control - unmodified MIT v2.1; pB-ori, negative  
720 control containing *nifBQFUSVWZM*;  $\Delta$ M, MIT V2.1 with *nifM* deleted. Peptide information  
721 for CAT and Nif proteins are provided in Supplementary Table 1.

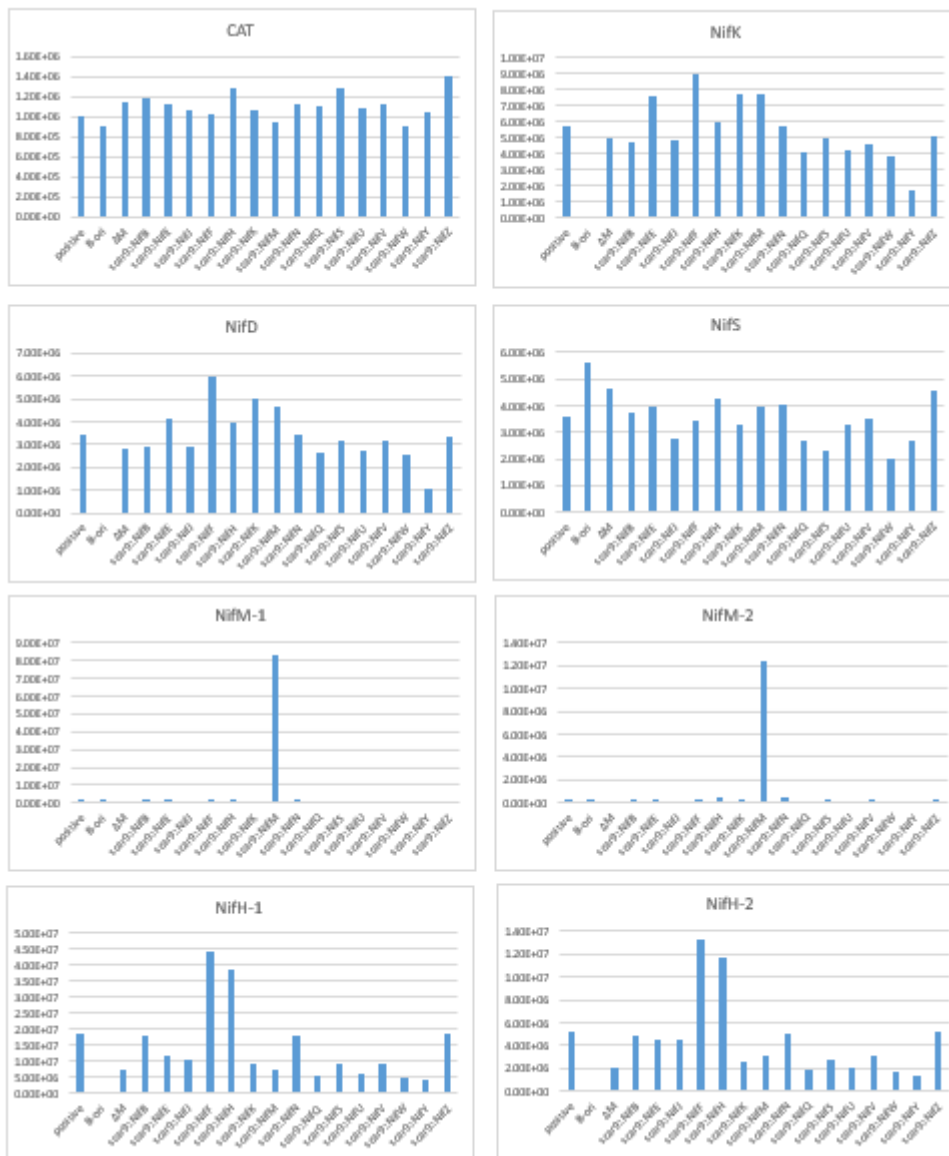

722

723

724 **Suppl. Table 1:** Multiple reaction monitoring transitions of peptides for targeted liquid  
 725 chromatography – multiple reaction monitoring – mass spectrometry.

| Protein | Peptide <sup>a</sup> | RT<br>(min) <sup>b</sup> | Q1<br><i>m/z</i> <sup>b</sup> | <i>z</i> <sup>b</sup> | Q3<br><i>m/z</i> <sup>a</sup> | Fragment | CE <sup>c</sup> |
|---------|----------------------|--------------------------|-------------------------------|-----------------------|-------------------------------|----------|-----------------|
| CAT     | YYTQGDK              | 1.0                      | 437.70                        | 2+                    | 319.16                        | y3+      | 20.45           |
|         |                      |                          |                               |                       | 447.22                        | y4+      | 20.45           |
|         |                      |                          |                               |                       | 548.26                        | y5+      | 20.45           |
|         |                      |                          |                               |                       | 711.33                        | y6+      | 20.45           |
| NifK    | EALTVDPAK            | 3.5                      | 472.25                        | 2+                    | 315.20                        | y3+      | 22.14           |
|         |                      |                          |                               |                       | 430.22                        | y4+      | 22.14           |
|         |                      |                          |                               |                       | 529.29                        | y5+      | 22.14           |
|         |                      |                          |                               |                       | 630.34                        | y6+      | 22.14           |
| NifD    | SMNYIAR              | 3.2                      | 427.71                        | 2+                    | 246.15                        | y2+      | 19.96           |
|         |                      |                          |                               |                       | 359.24                        | y3+      | 19.96           |
|         |                      |                          |                               |                       | 522.30                        | y4+      | 19.96           |
|         |                      |                          |                               |                       | 636.34                        | y5+      | 19.96           |
| NifS    | QVYLDNNATTR          | 3.2                      | 647.82                        | 2+                    | 676.33                        | y6+      | 30.74           |
|         |                      |                          |                               |                       | 791.36                        | y7+      | 30.74           |
|         |                      |                          |                               |                       | 904.44                        | y8+      | 30.74           |
|         |                      |                          |                               |                       | 1067.51                       | y9+      | 30.74           |
| NifH-1  | VMIVGC(cam)DPK       | 3.9                      | 509.75                        | 2+                    | 576.24                        | y5+      | 23.97           |
|         |                      |                          |                               |                       | 675.31                        | y6+      | 23.97           |
|         |                      |                          |                               |                       | 788.39                        | y7+      | 23.97           |
|         |                      |                          |                               |                       | 231.11                        | b2+      | 23.97           |
| NifH-2  | LGGLIC(cam)NSR       | 3.8                      | 495.26                        | 2+                    | 536.22                        | y4+      | 23.26           |
|         |                      |                          |                               |                       | 649.30                        | y5+      | 23.26           |
|         |                      |                          |                               |                       | 876.43                        | y8+      | 23.26           |
|         |                      |                          |                               |                       | 228.13                        | b3+      | 23.26           |
| NifM-1  | DAFAPLAQR            | 4.68                     | 494.76                        | 2+                    | 584.35                        | y5+      | 23.24           |
|         |                      |                          |                               |                       | 655.39                        | y6+      | 23.24           |
|         |                      |                          |                               |                       | 802.46                        | y7+      | 23.24           |
|         |                      |                          |                               |                       | 334.14                        | b3+      | 23.24           |
| NifM-2  | DYLWQQSQQR           | 4.47                     | 676.32                        | 2+                    | 646.33                        | y5+      | 32.14           |
|         |                      |                          |                               |                       | 774.39                        | y6+      | 32.14           |



|  |  |  |  |  |        |     |       |
|--|--|--|--|--|--------|-----|-------|
|  |  |  |  |  | 960.46 | y7+ | 32.14 |
|  |  |  |  |  | 279.10 | b2+ | 32.14 |

726

727 a. The peptide sequence is represented by single amino acid code. C (cam) refers to  
728 carbamidomethylation of cysteine.

729 b. RT, retention time (min); Q1  $m/z$ , precursor ion mass-to-charge ratio; z, charge state; Q3  
730  $m/z$ , fragment ion  $m/z$ ; CE, collision energy in V.

731 c. Collision energy settings were calculated ( $CE = \text{slope } (0.049) \times (\text{precursor } m/z) + \text{intercept}$   
732  $(-1.0)$ ) for a 6500 QTRAP mass spectrometer (AB SCIEX, Redwood City, USA).

733

734 **Suppl. Table 2:** Designations and descriptions of plasmids constructed to test mitochondrial  
735 targeting efficiency and protein solubility of Nif proteins transiently expressed in *Nicotiana*  
736 *benthamiana*. The protein size (kDa) was calculated using the average molecular weight of an  
737 amino acid as 0.11 kDa.

| Plasmid ID | Description                       | calculated protein size<br>(kDa) |
|------------|-----------------------------------|----------------------------------|
| SN192      | pFA $\gamma$ 51::NifB::HA         | 59                               |
| SN38       | pFA $\gamma$ 51::NifE::HA         | 57                               |
| SN138      | pFA $\gamma$ 51::NifF::HA         | 26                               |
| SN27       | pFA $\gamma$ 51::NifH::HA         | 39                               |
| SN139      | pFA $\gamma$ 51::NifJ::HA         | 135                              |
| SN140      | pFA $\gamma$ 51::HA::NifK         | 64                               |
| SN30       | pFA $\gamma$ 51::NifM::HA         | 36                               |
| SN39       | pFA $\gamma$ 51::NifN::HA         | 58                               |
| SN141      | pFA $\gamma$ 51::NifQ::HA         | 25                               |
| SN31       | pFA $\gamma$ 51::NifS::HA         | 51                               |
| SN32       | pFA $\gamma$ 51::NifU::HA         | 37                               |
| SN142      | pFA $\gamma$ 51::NifV::HA         | 49                               |
| SN143      | pFA $\gamma$ 51::NifW::HA         | 16                               |
| SN144      | pFA $\gamma$ 51::NifX::HA         | 24                               |
| SN145      | pFA $\gamma$ 51::NifY::HA         | 31                               |
| SN146      | pFA $\gamma$ 51::NifZ::HA         | 23                               |
| SN201      | 6 $\times$ His::NifB::HA          | 54                               |
| SN203      | 6 $\times$ His::NifE::HA          | 52                               |
| SN204      | 6 $\times$ His::NifF::HA          | 21                               |
| SN205      | 6 $\times$ His::NifH::HA          | 34                               |
| SN206      | 6 $\times$ His::NifJ::HA          | 130                              |
| SN72       | 6 $\times$ His::HA::NifK          | 59                               |
| SN207      | 6 $\times$ His::NifM::HA          | 31                               |
| SN208      | 6 $\times$ His::NifN::HA          | 53                               |
| SN209      | 6 $\times$ His::NifQ::HA          | 20                               |
| SN210      | 6 $\times$ His::NifS::HA          | 46                               |
| SN211      | 6 $\times$ His::NifU::HA          | 32                               |
| SN212      | 6 $\times$ His::NifV::HA          | 44                               |
| SN213      | 6 $\times$ His::NifW::HA          | 11                               |
| SN214      | 6 $\times$ His::NifX::HA          | 19                               |
| SN215      | 6 $\times$ His::NifY::HA          | 26                               |
| SN216      | 6 $\times$ His::NifZ::HA          | 18                               |
| SN149      | pFA $\gamma$ 77::NifM::HA         | 39                               |
| SN151      | pFA $\gamma$ 77::NifQ::HA         | 28                               |
| SN247      | pFA $\gamma$ 51m::NifS::HA        | 51                               |
| SN166      | pFA $\gamma$ 51::NifU::twin-Strep | 39                               |

739 **Suppl. Table 3:** Designations and descriptions of plasmids constructed for bacterial function  
740 testing in *Escherichia coli*.

| Plasmid ID | Description                      |
|------------|----------------------------------|
| pSO003     | MIT v2.1                         |
| pSO006     | scar9::NifB                      |
| pSO009     | scar9::NifD                      |
| pSO026     | scar9::NifE                      |
| pSO032     | scar9::NifF                      |
| pSO012     | scar9::NifH                      |
| pSO028     | scar9::NifJ                      |
| pSO029     | scar9::NifK                      |
| pSO038     | scar9::NifM                      |
| pSO027     | scar9::NifN                      |
| pSO031     | scar9::NifQ                      |
| pSO034     | scar9::NifS                      |
| pSO033     | scar9::NifU                      |
| pSO035     | scar9::NifV                      |
| pSO036     | scar9::NifW                      |
| pSO030     | scar9::NifY                      |
| pSO037     | scar9::NifZ                      |
| pSO051     | $\Delta nifM$                    |
| pSO013     | NifK::HA                         |
| pSO004     | pB-ori<br>( $\Delta NifHDKENJ$ ) |

741

742

743 **Suppl. Table 4:** Primers used to add the scar9 peptide onto the N-terminus of each Nif protein  
744 via translational fusion. BO, bridging oligo.

|              |                                                                                           |
|--------------|-------------------------------------------------------------------------------------------|
| scar9nifBfw  | 5'-ATGTCAACTCAAGTGGTGCGTAACCGCATGACCTCTTGTCGTCGTT-3'                                      |
| nifBbluntrv  | 5'-TTTAGCCCTCCTATGATTGATTTGATGTATTACAGAGAGG-3'                                            |
| scar9nifB_BO | 5'-GGTTACGCACCACCTTGAGTTGACATTTTAGCCCTCCTATGATTGATTTGATG-3'                               |
| scar9nifDfw  | 5'-ATGTCAACTCAAGTGGTGCGTAACCGCATGATGACTAATGCTACTGGCGAACGTAAC-3'                           |
| nifDbluntrv  | 5'-CCGGCTCCTCCGCTAGATAAAAAATGTGA-3'                                                       |
| scar9nifD_BO | 5'-CGCACCCTTGAGTTGACATCCGGCTCCTCCGTA-3'                                                   |
| scar9nifEfw  | 5'-ATGTCAACTCAAGTGGTGCGTAACCGCATGAAGGGTAACGAGATTCTTGCTCTGCTG-3'                           |
| nifEbluntrv  | 5'-TTGTAATAACCTCCAGTGATGAATTGAATAGTGTGG-3'                                                |
| scar9nifE_BO | 5'-GCGGTTACGCACCACCTTGAGTTGACATTTGTAATAACCTCCAGTGATGAATTGAATAGTGTGGC-3'                   |
| scar9nifFfw  | 5'-ATGTCAACTCAAGTGGTGCGTAACCGCATGGCGAACATCGGCATCTTCTTG-3'                                 |
| nifFbluntrv  | 5'-GTAGTAAAGCCTCCTATAATTGAGACTCTTGCTC-3'                                                  |
| scar9nifF_BO | 5'-GCGGTTACGCACCACCTTGAGTTGACATGTAGTAAAGCCTCCTATAATTGAGACTCTTGCTCTCCC-3'                  |
| scar9nifHfw  | 5'-ATGTCAACTCAAGTGGTGCGTAACCGCATGACCATGCGTCAGTGC-3'                                       |
| nifHbluntrv  | 5'-ATATGAAACCTCCTTAAATATATTATATATTTGTATCTCCAATAGTGAGTCGATTAGAGTCAC-3'                     |
| scar9nifH_BO | 5'-GGTTACGCACCACCTTGAGTTGACATATATGAAACCTCCTTAAATATATTATATATTTGTATCTCCC-3'                 |
| scar9nifJfw  | 5'-ATGTCAACTCAAGTGGTGCGTAACCGCATGAAACTATGGACGGTAACGCTGCG-3'                               |
| nifJbluntrv  | 5'-GCTTAATTTCTCCATATTAATCTCTAGTTAATCCGCTGCG-3'                                            |
| scar9nifJ_BO | 5'-GTTTTCATGCGGTTACGCACCACCTTGAGTTGACATGCTTAATTTCTCCATATTAATCTCTAGTTAATCCGCTGCGTACGCGC-3' |
| scar9nifKfw  | 5'-ATGTCAACTCAAGTGGTGCGTAACCGCATGTCTCAAACCTATCGATAAAATCAAACCTTGTTACCCG-3'                 |
| nifKbluntrv  | 5'-GTTACCTCGCCTAATTTTGGAGAGTATGA-3'                                                       |
| scar9nifK_BO | 5'-GCGGTTACGCACCACCTTGAGTTGACATGTTACCTCGCCTAATTTTGGAGAGTATGAGATTGCAAG-3'                  |
| scar9nifMfw  | 5'-ATGTCAACTCAAGTGGTGCGTAACCGCATGAATCCGTGGCAGCGCTTG-3'                                    |
| nifMbluntrv  | 5'-TATAGACCTCCTGGTAATAACTTCAGTCTCTG-3'                                                    |
| scar9nifM_BO | 5'-GCGGTTACGCACCACCTTGAGTTGACATTATAGACCTCCTGGTAATAACTTCAGTCTCTGAGA-3'                     |
| scar9nifNfw  | 5'-ATGTCAACTCAAGTGGTGCGTAACCGCATGGCAGACATTTCCGCACTGATAAGCC-3'                             |
| nifNbluntrv  | 5'-AATTACTTCTCCAGGTGTGGTAGGTTAGGTGC-3'                                                    |
| scar9nifN_BO | 5'-GCGGTTACGCACCACCTTGAGTTGACATAAATCTTCCAGGTGTGGTAGGTTAGGTGC-3'                           |
| scar9nifQfw  | 5'-ATGTCAACTCAAGTGGTGCGTAACCGCATGCCGCCATTGGACTGGTTGC-3'                                   |
| nifQbluntrv  | 5'-GCTTAATTTCTCCTCTTAATGCCACTACGTGC-3'                                                    |
| scar9nifQ_BO | 5'-GCGGTTACGCACCACCTTGAGTTGACATGCTTAATTTCTCCTCTTAATGCCACTACGTGC-3'                        |
| scar9nifSfw  | 5'-ATGTCAACTCAAGTGGTGCGTAACCGCATGAAACAAGTGTACCTGGACAACAACG-3'                             |
| nifSbluntrv  | 5'-GGAAAACCTCCTTCGATTCAGAATGGTC-3'                                                        |
| scar9nifS_BO | 5'-GCGGTTACGCACCACCTTGAGTTGACATGGAAAACCTCCTTCGATTCAGAATGGTCTACG-3'                        |
| scar9nifUfw  | 5'-ATGTCAACTCAAGTGGTGCGTAACCGCATGTGGAACACTACAGCGAGAAAGTCAAGG-3'                           |
| nifUbluntrv  | 5'-TAGGAACCTCCTTCGCTGGTTATTTG-3'                                                          |
| scar9nifU_BO | 5'-GCGGTTACGCACCACCTTGAGTTGACATTAGGAACCTCCTTCGCTGGTTATTTGTCAG-3'                          |
| scar9nifVfw  | 5'-ATGTCAACTCAAGTGGTGCGTAACCGCATGGAGCGCGTCTTGATCAACG-3'                                   |
| nifVbluntrv  | 5'-ATGTTTCCTTGCGGAGTTAGGC-3'                                                              |
| scar9nifV_BO | 5'-GCGGTTACGCACCACCTTGAGTTGACATATGTTTCCTTGCGGAGTTAGGCT-3'                                 |
| scar9nifWfw  | 5'-ATGTCAACTCAAGTGGTGCGTAACCGCATGGAGTGGTTTTACCAGATCCGGG-3'                                |
| nifWbluntrv  | 5'-TCTGTTTCTACTCCCTTCTCTTGAAACTATCG-3'                                                    |

|              |                                                                      |
|--------------|----------------------------------------------------------------------|
| scar9nifW_BO | 5'-GCGGTTACGCACCACTTGAGTTGACATTCTGTTTCTACTCCCTTTCTCTTGAAACTATCGGG-3' |
| scar9nifYfw  | 5'-ATGTCAACTCAAGTGGTGCCTAACCGCATGTCTGACAATGATACCCTGTTTTGGCG-3'       |
| nifYblunrv   | 5'-AGAAGTACCTCCGGGAGTGAGTATGG-3'                                     |
| scar9nifY_BO | 5'-GCGGTTACGCACCACTTGAGTTGACATAGAAGTACCTCCGGGAGTGAGTATGG-3'          |
| scar9nifZfw  | 5'-ATGTCAACTCAAGTGGTGCCTAACCGCATGCGCCCGAAATTCACCTTCTC-3'             |
| nifZblunrv   | 5'-TGTATGACCTATATTGATTCGGGCTGGTG-3'                                  |
| scar9nifZ_BO | 5'-GCGGTTACGCACCACTTGAGTTGACATTGTATGACCTATATTGATTCGGGCTGGTGAAG-3'    |
